# Supplementary material for: Efficacy and safety of remdesivir in COVID-19 caused by SARS-CoV-2: a systematic review and meta-analysis
Source: PubMed Central journal article supplement — BMJ Open. 2021 Jun 24;11(6):e048416. doi: 10.1136/bmjopen-2020-048416 (PMC8228818; doi:10.1136/bmjopen-2020-048416), 2021-06-24
Supplement: bmjopen-2020-048416.draft_revisions.pdf [file bmjopen-2020-048416.draft_revisions.pdf]

# BMJ Open

BMJ Open is committed to open peer review. As part of this commitment we make the peer review history of every article we publish publicly available.

When an article is published we post the peer reviewers' comments and the authors' responses online. We also post the versions of the paper that were used during peer review. These are the versions that the peer review comments apply to.

The versions of the paper that follow are the versions that were submitted during the peer review process. They are not the versions of record or the final published versions. They should not be cited or distributed as the published version of this manuscript.

BMJ Open is an open access journal and the full, final, typeset and author-corrected version of record of the manuscript is available on our site with no access controls, subscription charges or pay-per-view fees (<http://bmjopen.bmj.com>).

If you have any questions on BMJ Open's open peer review process please email [info.bmjopen@bmj.com](mailto:info.bmjopen@bmj.com)

# BMJ Open

## Efficacy and safety of Remdesivir in COVID-19 caused by SARS-CoV-2: A systematic review and meta-analysis

|                               |                                                                                                                                                                                                                                                                                                                                                                                                                                                                  |
|-------------------------------|------------------------------------------------------------------------------------------------------------------------------------------------------------------------------------------------------------------------------------------------------------------------------------------------------------------------------------------------------------------------------------------------------------------------------------------------------------------|
| Journal:                      | <i>BMJ Open</i>                                                                                                                                                                                                                                                                                                                                                                                                                                                  |
| Manuscript ID                 | bmjopen-2020-048416                                                                                                                                                                                                                                                                                                                                                                                                                                              |
| Article Type:                 | Original research                                                                                                                                                                                                                                                                                                                                                                                                                                                |
| Date Submitted by the Author: | 24-Dec-2020                                                                                                                                                                                                                                                                                                                                                                                                                                                      |
| Complete List of Authors:     | Singh, Surjit ; All India Institute of Medical Sciences, Department of Pharmacology<br>Khera, Daisy; All India Institute of Medical Sciences, Department of Pediatrics<br>Chugh, Ankita; All India Institute of Medical Sciences, Department of Dentistry<br>Khera, Pushpinder; All India Institute of Medical Sciences, Department of Diagnostic and Interventional Radiology<br>Chugh, Vinay; All India Institute of Medical Sciences, Department of Dentistry |
| Keywords:                     | COVID-19, Immunology < NATURAL SCIENCE DISCIPLINES, CLINICAL PHARMACOLOGY, Respiratory infections < THORACIC MEDICINE                                                                                                                                                                                                                                                                                                                                            |
|                               |                                                                                                                                                                                                                                                                                                                                                                                                                                                                  |

SCHOLARONE™  
Manuscripts

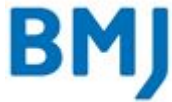

I, the Submitting Author has the right to grant and does grant on behalf of all authors of the Work (as defined in the below author licence), an exclusive licence and/or a non-exclusive licence for contributions from authors who are: i) UK Crown employees; ii) where BMJ has agreed a CC-BY licence shall apply, and/or iii) in accordance with the terms applicable for US Federal Government officers or employees acting as part of their official duties; on a worldwide, perpetual, irrevocable, royalty-free basis to BMJ Publishing Group Ltd ("BMJ") its licensees and where the relevant Journal is co-owned by BMJ to the co-owners of the Journal, to publish the Work in this journal and any other BMJ products and to exploit all rights, as set out in our [licence](#).

The Submitting Author accepts and understands that any supply made under these terms is made by BMJ to the Submitting Author unless you are acting as an employee on behalf of your employer or a postgraduate student of an affiliated institution which is paying any applicable article publishing charge ("APC") for Open Access articles. Where the Submitting Author wishes to make the Work available on an Open Access basis (and intends to pay the relevant APC), the terms of reuse of such Open Access shall be governed by a Creative Commons licence – details of these licences and which [Creative Commons](#) licence will apply to this Work are set out in our licence referred to above.

Other than as permitted in any relevant BMJ Author's Self Archiving Policies, I confirm this Work has not been accepted for publication elsewhere, is not being considered for publication elsewhere and does not duplicate material already published. I confirm all authors consent to publication of this Work and authorise the granting of this licence.

1  
2  
3 **Title: Efficacy and safety of Remdesivir in COVID-19 caused by SARS-CoV-2: A**  
4 **systematic review and meta-analysis**  
5  
6

7 **Running title :**Effectiveness of Remdesivir in COVID-19  
8

9  
10 **Authors:** Surjit Singh, D.M<sup>1</sup>, Daisy Khera, M.D<sup>2</sup>, Ankita Chugh, MDS<sup>3</sup>, Pushpinder Singh  
11  
12 Khera<sup>4</sup>, Vinay Kumar Chugh<sup>5</sup>  
13  
14

15 **Affiliations:**

16  
17 <sup>1</sup>Additional Professor, Department of Pharmacology, All India Institute of Medical  
18 Sciences, Jodhpur, India. Email id: [sehmbys\\_s@yahoo.com](mailto:sehmbys_s@yahoo.com). ORCID id: 0000-0002-  
19 8990-3235.  
20  
21  
22  
23

24 <sup>2</sup>Additional Professor, Department of Pediatrics, All India Institute of Medical  
25 Sciences, Jodhpur, India. Email id: [daisykhera78@gmail.com](mailto:daisykhera78@gmail.com). ORCID ID: 0000-  
26 0002-2963-1370  
27  
28  
29  
30

31 <sup>3</sup>Additional Professor, Department of Dentistry, All India Institute of Medical  
32 Sciences, Jodhpur, India. Email id: [ankitamody@gmail.com](mailto:ankitamody@gmail.com).  
33  
34  
35

36 <sup>4</sup>Additional Professor, Department of Diagnostic and Interventional Radiology, All  
37 India Institute of Medical Sciences, Jodhpur, India. Email id:  
38 [pushpinderkhera@gmail.com](mailto:pushpinderkhera@gmail.com)  
39  
40  
41  
42

43 <sup>5</sup>Additional Professor, Department of Dentistry, All India Institute of Medical  
44 Sciences, Jodhpur, India. Email id: [drvinaychd@yahoo.com](mailto:drvinaychd@yahoo.com).  
45  
46  
47  
48  
49

50 Corresponding Author:  
51

52  
53 **Corresponding contributor:**

54 Dr. Surjit Singh MD, DM  
55 Additional Professor  
56 Department of Pharmacology  
57 AIIMS, Jodhpur, Rajasthan - 342005  
58 E-mail – [sehmbys\\_s@yahoo.com](mailto:sehmbys_s@yahoo.com).  
59  
60

1  
2  
3  
4  
5 Total number of pages: 22  
6

7  
8 Total number of photographs: 0, Tables – 2, Figures – 4, Supplementary Figures – 2 ; Use  
9  
10 color for online printing only. For journal use black and white format of images.  
11

12  
13 Word counts - 2592  
14

15  
16 for abstract: 248  
17

18  
19 for the text: 2344  
20  
21  
22  
23  
24  
25  
26  
27  
28  
29  
30  
31  
32  
33  
34  
35  
36  
37  
38  
39  
40  
41  
42  
43  
44  
45  
46  
47  
48  
49  
50  
51  
52  
53  
54  
55  
56  
57  
58  
59  
60

For peer review only

1  
2  
3 **Title: Efficacy and safety of Remdesivir in COVID-19 caused by SARS-CoV-2: A**  
4 **systematic review and meta-analysis**  
5  
6  
7

8 **ABSTRACT**  
9

10  
11 **Objectives:** Remdesivir, an RNA polymerase inhibitor, evaluated for effectiveness in  
12 comparison to Standard therapy in adult COVID-19 patients.  
13  
14

15  
16 **Data sources:** Electronic search for eligible articles of Medline (via PubMed), The Cochrane  
17 Central Register of Controlled Trials, and clinicaltrials.gov was done.  
18  
19

20  
21 **Participants & study eligibility criteria:** Only RCTs aimed to evaluate the efficacy of  
22 Remdesivir in the treatment COVID-19 were considered eligible for this systematic review.  
23  
24

25  
26 **Interventions:** Remdesivir was compared with standard of care, which acts as control group  
27  
28

29  
30 **Primary and secondary outcomes:** Primary outcomes was mortality and secondary  
31 outcomes were time to clinical improvement and safety outcomes like serious adverse events,  
32 respiratory failure  
33  
34  
35

36  
37 **Study appraisal and synthesis methods:** Meta-analysis was performed by Cochrane review  
38 manager 5 (RevMan) version 5.3. Cochrane risk of bias 2.0 tool was used for methodological  
39 quality assessment. The GRADE pro GDT was applied for overall quality of evidence.  
40  
41  
42

43  
44 **Results:** 52 RCTs were screened and 4 studies were included in analysis, with total of 7324  
45 patients. No mortality benefit with use of remdesivir versus standard of care [OR=0.92  
46 (95%CI = 0.79 – 1.07), p=0.30, moderate quality evidence]. Significant clinical improvement  
47 [OR=1.52 (95%CI = 1.24 – 1.87), p<0.0001, low quality] and time to clinical improvement  
48 [HR=1.28 (95%CI = 1.12 – 1.46), p=0.0002, very low quality] with the use of remdesivir  
49 versus control group. Significant decrease was found in the risk of serious adverse  
50 events [RR=0.75 (95%CI = 0.62 – 0.90), p=0.0003, low quality], however no difference was  
51  
52  
53  
54  
55  
56  
57  
58  
59  
60

1  
2  
3 found in the risk of respiratory failure [RR=0.85 (95%CI = 0.41 – 1.77), p=0.67, very low  
4 quality evidence] with remdesivir.  
5  
6

7  
8 **Conclusions:** With the current evidence on efficacy and safety of remdesivir, authors do not  
9 recommend use of Remdesivir for treatment for COVID-19 patients caused by SARS-CoV-2,  
10 as it has shown no mortality benefit (moderate quality evidence) and cost-benefit analysis  
11 revealed limited use especially in developing countries.  
12  
13  
14  
15

16  
17  
18 **Systematic review registration:** PROSPERO registration number: CRD42020189517  
19

20  
21 **Keywords:** Remdesivir, COVID-19, SARS-CoV-2  
22

## 23 **Article Summary**

### 24 **Strengths and Limitations of this study**

- 25  
26  
27  
28  
29  
30  
31  
32  
33  
34  
35  
36  
37  
38  
39  
40  
41  
42  
43  
44  
45  
46  
47  
48  
49  
50  
51  
52  
53  
54  
55  
56  
57  
58  
59  
60  
61  
62  
63  
64  
65  
66  
67  
68  
69  
70  
71  
72  
73  
74  
75  
76  
77  
78  
79  
80  
81  
82  
83  
84  
85  
86  
87  
88  
89  
90  
91  
92  
93  
94  
95  
96  
97  
98  
99  
100  
101  
102  
103  
104  
105  
106  
107  
108  
109  
110  
111  
112  
113  
114  
115  
116  
117  
118  
119  
120  
121  
122  
123  
124  
125  
126  
127  
128  
129  
130  
131  
132  
133  
134  
135  
136  
137  
138  
139  
140  
141  
142  
143  
144  
145  
146  
147  
148  
149  
150  
151  
152  
153  
154  
155  
156  
157  
158  
159  
160  
161  
162  
163  
164  
165  
166  
167  
168  
169  
170  
171  
172  
173  
174  
175  
176  
177  
178  
179  
180  
181  
182  
183  
184  
185  
186  
187  
188  
189  
190  
191  
192  
193  
194  
195  
196  
197  
198  
199  
200  
201  
202  
203  
204  
205  
206  
207  
208  
209  
210  
211  
212  
213  
214  
215  
216  
217  
218  
219  
220  
221  
222  
223  
224  
225  
226  
227  
228  
229  
230  
231  
232  
233  
234  
235  
236  
237  
238  
239  
240  
241  
242  
243  
244  
245  
246  
247  
248  
249  
250  
251  
252  
253  
254  
255  
256  
257  
258  
259  
260  
261  
262  
263  
264  
265  
266  
267  
268  
269  
270  
271  
272  
273  
274  
275  
276  
277  
278  
279  
280  
281  
282  
283  
284  
285  
286  
287  
288  
289  
290  
291  
292  
293  
294  
295  
296  
297  
298  
299  
300  
301  
302  
303  
304  
305  
306  
307  
308  
309  
310  
311  
312  
313  
314  
315  
316  
317  
318  
319  
320  
321  
322  
323  
324  
325  
326  
327  
328  
329  
330  
331  
332  
333  
334  
335  
336  
337  
338  
339  
340  
341  
342  
343  
344  
345  
346  
347  
348  
349  
350  
351  
352  
353  
354  
355  
356  
357  
358  
359  
360  
361  
362  
363  
364  
365  
366  
367  
368  
369  
370  
371  
372  
373  
374  
375  
376  
377  
378  
379  
380  
381  
382  
383  
384  
385  
386  
387  
388  
389  
390  
391  
392  
393  
394  
395  
396  
397  
398  
399  
400  
401  
402  
403  
404  
405  
406  
407  
408  
409  
410  
411  
412  
413  
414  
415  
416  
417  
418  
419  
420  
421  
422  
423  
424  
425  
426  
427  
428  
429  
430  
431  
432  
433  
434  
435  
436  
437  
438  
439  
440  
441  
442  
443  
444  
445  
446  
447  
448  
449  
450  
451  
452  
453  
454  
455  
456  
457  
458  
459  
460  
461  
462  
463  
464  
465  
466  
467  
468  
469  
470  
471  
472  
473  
474  
475  
476  
477  
478  
479  
480  
481  
482  
483  
484  
485  
486  
487  
488  
489  
490  
491  
492  
493  
494  
495  
496  
497  
498  
499  
500  
501  
502  
503  
504  
505  
506  
507  
508  
509  
510  
511  
512  
513  
514  
515  
516  
517  
518  
519  
520  
521  
522  
523  
524  
525  
526  
527  
528  
529  
530  
531  
532  
533  
534  
535  
536  
537  
538  
539  
540  
541  
542  
543  
544  
545  
546  
547  
548  
549  
550  
551  
552  
553  
554  
555  
556  
557  
558  
559  
560  
561  
562  
563  
564  
565  
566  
567  
568  
569  
570  
571  
572  
573  
574  
575  
576  
577  
578  
579  
580  
581  
582  
583  
584  
585  
586  
587  
588  
589  
590  
591  
592  
593  
594  
595  
596  
597  
598  
599  
600  
601  
602  
603  
604  
605  
606  
607  
608  
609  
610  
611  
612  
613  
614  
615  
616  
617  
618  
619  
620  
621  
622  
623  
624  
625  
626  
627  
628  
629  
630  
631  
632  
633  
634  
635  
636  
637  
638  
639  
640  
641  
642  
643  
644  
645  
646  
647  
648  
649  
650  
651  
652  
653  
654  
655  
656  
657  
658  
659  
660  
661  
662  
663  
664  
665  
666  
667  
668  
669  
670  
671  
672  
673  
674  
675  
676  
677  
678  
679  
680  
681  
682  
683  
684  
685  
686  
687  
688  
689  
690  
691  
692  
693  
694  
695  
696  
697  
698  
699  
700  
701  
702  
703  
704  
705  
706  
707  
708  
709  
710  
711  
712  
713  
714  
715  
716  
717  
718  
719  
720  
721  
722  
723  
724  
725  
726  
727  
728  
729  
730  
731  
732  
733  
734  
735  
736  
737  
738  
739  
740  
741  
742  
743  
744  
745  
746  
747  
748  
749  
750  
751  
752  
753  
754  
755  
756  
757  
758  
759  
760  
761  
762  
763  
764  
765  
766  
767  
768  
769  
770  
771  
772  
773  
774  
775  
776  
777  
778  
779  
780  
781  
782  
783  
784  
785  
786  
787  
788  
789  
790  
791  
792  
793  
794  
795  
796  
797  
798  
799  
800  
801  
802  
803  
804  
805  
806  
807  
808  
809  
810  
811  
812  
813  
814  
815  
816  
817  
818  
819  
820  
821  
822  
823  
824  
825  
826  
827  
828  
829  
830  
831  
832  
833  
834  
835  
836  
837  
838  
839  
840  
841  
842  
843  
844  
845  
846  
847  
848  
849  
850  
851  
852  
853  
854  
855  
856  
857  
858  
859  
860  
861  
862  
863  
864  
865  
866  
867  
868  
869  
870  
871  
872  
873  
874  
875  
876  
877  
878  
879  
880  
881  
882  
883  
884  
885  
886  
887  
888  
889  
890  
891  
892  
893  
894  
895  
896  
897  
898  
899  
900  
901  
902  
903  
904  
905  
906  
907  
908  
909  
910  
911  
912  
913  
914  
915  
916  
917  
918  
919  
920  
921  
922  
923  
924  
925  
926  
927  
928  
929  
930  
931  
932  
933  
934  
935  
936  
937  
938  
939  
940  
941  
942  
943  
944  
945  
946  
947  
948  
949  
950  
951  
952  
953  
954  
955  
956  
957  
958  
959  
960  
961  
962  
963  
964  
965  
966  
967  
968  
969  
970  
971  
972  
973  
974  
975  
976  
977  
978  
979  
980  
981  
982  
983  
984  
985  
986  
987  
988  
989  
990  
991  
992  
993  
994  
995  
996  
997  
998  
999  
1000
- There is preliminary evidence of clinical benefit and approval of remdesivir as compassionate use by US FDA in COVID-19 patients.
- Our study showed No Mortality benefit with the use of Remdesivir in COVID-19 patients, with moderate quality evidence.
- Subgroup analysis showed No mortality benefit in patients with or without requirement of assisted ventilation.
- Benefit in time to clinical improvement but with “Very low” quality of evidence. Systematic review indicates no benefit with the use of remdesivir in COVID-19 patients.
- Overall evidence suggests no beneficial effect and thus recommend against the use of remdesivir, especially in lower to middle income countries.

## INTRODUCTION

A novel coronavirus disease (COVID-19), caused by infection with SARS-CoV-2, created a pandemic of mortality all over the world.[1, 2] The global pandemic of SARS-CoV-2 infections has affected more than 3.8 million people world-wide and has been the cause of 1.08 million deaths globally by the 10<sup>th</sup> of October 2020 as per COVID-19 statistics data. Twenty six million people have recovered and as the trend suggests most of them either stay asymptomatic and few of them develop pneumonia like symptoms that does not require oxygen support.[3] A very small percentage get critical to the limit of hypoxia, acute respiratory distress syndrome and multi- organ failure. Among these critical patients who are being put on mechanical ventilation, half of them die.

The search for an effective therapy or preventive modality has become the utmost need of the hour. There are few proposed and approved drugs with some antiviral action and they are under investigation simultaneously across the globe. But as yet no proven effective therapy for SARS -CoV-2 has been accepted widely. Amongst the few promising therapies available remdesivir, a viral RNA polymerase inhibitor has been recommended by US FDA as a drug for compassionate use for treatment of COVID-19 patients. Remdesivir, a nucleoside analogue prodrug, has shown inhibitory effects on SARS-CoV-2, both in vitro and in animal models. However even for the above mentioned studies, contrasting results have been reported in different nations like China and USA.[3] Varied study designs[4, 5], genetic reasons and different treatment regimens (5 or 10 days) have been attributed for this difference.

Only two randomized controlled clinical trials (RCT) have shown efficacy of remdesivir in COVID-19 patients. Many RCTs are undergoing to assess the benefit-risk ratio of remdesivir.



1  
2  
3 Current review was planned to assess the mortality and clinical benefit in addition to safety of  
4 remdesivir in the treatment of COVID-19 caused by SARS-CoV-2.  
5  
6

## 7 8 **METHODS**

### 9 10 **Protocol and registration**

11  
12  
13 The present systematic review was done as per the PRISMA (Preferred Reporting Items for  
14 Systematic Reviews and Meta-Analyses) statement. The protocol has been registered with  
15 PROSPERO (International Prospective Register of Systematic Reviews) database; protocol  
16 number as CRD42020189517.  
17  
18

### 19 20 **Criteria for study inclusion**

21  
22  
23 Only RCTs evaluating role of remdesivir compared to standard care in COVID-19 were  
24 included. Observational studies, review articles, case reports or case series were excluded.  
25  
26

### 27 28 **Search strategy and study selection**

29  
30  
31 Electronic literature search using Medline (via PubMed), The Cochrane Central Register of  
32 Controlled Trials and clinicaltrials.gov was conducted on 20<sup>th</sup> September 2020, to identify all  
33 the published relevant articles. Bibliographic search of published articles were also done  
34 manually to identify more studies. Language or publication status restriction was applied.  
35  
36 Search strategy using following medical subject headings (MeSH) was developed: ‘SARS-  
37 CoV-2’, ‘COVID-19’, ‘Remdesivir’, ‘COVID’, ‘novel coronavirus’. RCT restriction was  
38 applied.  
39  
40

41  
42  
43 The titles and abstracts retrieved by electronic searching were assessed by two independent  
44 researchers for potential eligibility and duplicates removed.  
45  
46

### 47 48 **Data extraction**

49  
50  
51 Study design, remdesivir doses and regimens, total subjects along with their characteristics,  
52 efficacy and safety outcomes were extracted on pre-structured form.  
53  
54  
55  
56  
57  
58  
59  
60

## Study outcomes

The primary outcome included in our review was mortality (defined as deaths in each group).

The secondary outcomes were clinical improvement and virological cure. In addition serious adverse events and other safety parameters were assessed.

## Quality assessment of studies

Two authors independently (DK and AC) assessed the methodological quality of included studies. Cochrane Collaboration risk of bias 2 tool (ROB-2) [6] was used. Overall assessment was recorded as high, low and some concerns. Robvis (visualization tool)[7] was used for synthesis of plots for risk of bias.[7]

For publication bias assessment, funnel plot asymmetry was not assessed as studies were less than five. However, Egger's regression test was applied.

## Data synthesis and summary measures

Dichotomous data were summarized as odd ratios (OR) and adjusted hazard ratios (HR) with 95% confidence intervals (CI) wherever applicable. Review Manager 5 (RevMan) Version 5.3. (Copenhagen: The Nordic Cochrane Centre, The Cochrane Collaboration, 2014) was used for all the analyses.[8] Heterogeneity was assessed using  $I^2$  [9, 10]. The results of both fixed and random effect model were assessed for interpretation [9, 11].

## Assessment of Quality of Evidence - GRADE Pro analysis

The overall quality of evidence for each of the outcomes was assessed using GRADE pro GDT (guideline development tool) software based on the principles of Grades of Recommendations, Assessment, Development and Evaluation (GRADE).[12] Optimal information size (OIS) was calculated to be 1213 patients in each group. Final overall

GRADE may be high, moderate, low or very low. The online version of GRADE pro GDT software was accessed from the site: <https://grade.pro.org/>. [12]

## **Patient and Public Involvement**

Patients or the public WERE NOT involved in the design, or conduct, or reporting, or dissemination plans of our research

## **RESULTS**

### **Study selection**

The study selection and exclusion process has been documented using the PRISMA flow diagram (Figure 1). Out of total 52 records screened, 4 RCTs[3, 13, 14] were included in analysis.

### **Study characteristics**

Study characteristics of RCTs of present systematic review are mentioned in Table 1.

### **Risk of bias (ROB) within the studies**

The overall risk of bias was assessed as “Low” as WHO solidarity trial[14] and Wang et al.[3] ROB was assessed as low. Study done by Beigel et al[13] and Spinner et al.[15] was regarded as having “High” ROB. Hence, ROB assessed for outcomes having data only from Beigel et al. and Spinner et al. in GRADE analysis was regarded as having serious issues. The ROB of RCTs was represented in Figure 2 and Supplementary Figure 1 (Weighted summary ROB).

### **Efficacy outcomes**

#### **Mortality**

Mortality data was included from 4 RCTs with 3818 and 3506 patients in Remdesivir and standard of care groups, respectively. Remdesivir has no mortality benefit as compared to control group [OR=0.92 (95%CI = 0.79 – 1.07), p=0.30; I<sup>2</sup>=0] (Figure 3a). Sub-group

1  
2  
3 analysis revealed no mortality benefit in low risk and high groups (Figure 3a, Supplementary  
4  
5 Figure 2)

### 6 7 8 **Clinical Improvement**

9  
10 Statistically significant increase in rates of clinical improvement in remdesivir versus controls  
11  
12 was found [OR=1.52 (95%CI = 1.24 – 1.87),  $p<0.0001$ ;  $I^2=0\%$ ] (Figure 3b). Results were  
13  
14 drawn from 3 RCTs with total of 1879 patients.

### 15 16 17 **Time to clinical improvement**

18  
19 Pooled analysis revealed that there was significant increase in the time to clinical  
20  
21 improvement in remdesivir group as compared to controls [HR=1.28 (95%CI = 1.12 – 1.46),  
22  
23  $p=0.0002$ ;  $I^2=0\%$ ](Figure 3c). Data extracted from 2 RCTs with total of 1292 patients.

### 24 25 26 **Safety outcomes**

#### 27 28 **Serious Adverse Events (AE)**

29  
30 Pooled analysis revealed significant increase in the risk of serious adverse events in control  
31  
32 group as compared to remdesivir [RR=0.75 (95%CI = 0.62 – 0.90),  $p=0.0003$ ;  $I^2=0\%$ ]  
33  
34 (Figure 4a). This data was extracted from 3 RCTs with a total of 1875 patients.

#### 35 36 37 **Respiratory Failure**

38  
39 No difference in the risk of respiratory failure between remdesivir and control groups was  
40  
41 found [RR=0.85 (95%CI = 0.41 – 1.77),  $p=0.67$ ;  $I^2=55\%$ ] (Figure 4b). Findings were derived  
42  
43 from 2 RCTs with a total of 1291 patients.

#### 44 45 46 **Publication bias**

47  
48 Though the funnel plot asymmetry was not assessed. The Egger's regression test applied on  
49  
50 four studies included in mortality rate assessment showed no publication bias ( $t = - 0.5947$ ,  $p$   
51  
52  $= 0.6123$ ).

#### 53 54 55 **GRADE analysis of the primary and secondary outcomes (Table 2)**

1  
2  
3 The GRADE analysis recommendation for mortality was ‘Moderate’ evidence quality.  
4  
5 Though there is low ROB, low heterogeneity and direct outcome but there are serious  
6  
7 concerns with imprecision. The quality of evidence for clinical improvement and time to  
8  
9 clinical improvement were graded as “Low” and “Very Low” respectively. The GRADE  
10  
11 recommendation for serious AE and respiratory failure were “Low” and “Very low” quality  
12  
13 of evidence respectively, as there was presence of high ROB and high imprecision. The  
14  
15 GRADE recommendation is shown in table 2.  
16  
17  
18  
19  
20  
21  
22

## 23 Discussion

24  
25  
26 With the existing recommendation of USFDA for compassionate use of Remdesivir in  
27  
28 COVID patients, it is being used worldwide. Current systematic review was planned for  
29  
30 recommendation drawn from RCTs evaluating the efficacy of remdesivir in COVID-19  
31  
32 patients.  
33  
34  
35

36  
37 In the current systematic review, ORs for mortality was unable to confer any mortality  
38  
39 benefit with the use of remdesivir. WHO solidarity trial[14] showed no mortality benefit with  
40  
41 the use of remdesivir. Though it was an open label study, it is less likely to have bias in  
42  
43 assessment of objective outcome like mortality. A total of 3451 patients were included in  
44  
45 remdesivir and standard of care groups. Subgroup analysis revealed no mortality benefit in  
46  
47 low risk (Figure 3a - no oxygen requirement, Supplementary Figure 2 – No invasive  
48  
49 ventilation) or high risk (Figure 3a - oxygen requirement or assisted ventilation,  
50  
51 Supplementary Figure 2 – Invasive ventilation) group of patients with remdesivir.  
52  
53  
54

55  
56 At the time of recruitment, more patients were on invasive mechanical ventilation or ECMO  
57  
58 in the placebo group. There were significantly more number of serious adverse events  
59  
60

1  
2  
3 reported in our review due to increase serious AE in Beigel et al study.[13] This is rare  
4  
5 occurrence that serious AE were significantly more in control group. The fact that more  
6  
7 severe patients were randomized into control group in the study by Beigel et al.[13] is the  
8  
9 major reason for this finding. Similarly, the serious AE which also included the clinical  
10  
11 events like renal failure and respiratory failure (5.2% in remdesivir and 8% in placebo arm)  
12  
13 were also observed more in placebo group. Despite this imbalance, remdesivir was unable to  
14  
15 show superiority in mortality rate.  
16  
17  
18  
19

20  
21 Sub-group analysis of Beigel et al.[13] study revealed that remdesivir resulted in significant  
22  
23 rate of clinical improvement in COVID-19 patients on oxygen therapy, while the patients not  
24  
25 on oxygen, or on high flow oxygen or non-invasive ventilation and receiving mechanical  
26  
27 ventilation or ECMO had similar clinical improvement as standard of care.  
28  
29

30  
31 Placebo used in Beigel et al.[13] study was sulfo-butyl-ether b-cyclodextrin-sodium  
32  
33 (SBECD), used to dissolve remdesivir. The maximum recommended daily dose is  
34  
35 approximately 250 mg/kg solvent used to dissolve remdesivir.[13] The amount of solvent  
36  
37 present in placebo was not quantified in protocol. Dose of solvent should be modified in  
38  
39 patients with eGFR fall of more than 50% from baseline and is contraindicated in patients  
40  
41 with eGFR less than 30ml/min. But such modification were not done in either arms. Hence  
42  
43 the effect of solvent on patients with impaired renal function can be detrimental and cannot  
44  
45 be ruled out.  
46  
47  
48  
49

50  
51 In the study by Beigel et al.[13], the median time of administration of drug from  
52  
53 randomization was nine days. Median recovery time from randomization was 11 days. In  
54  
55 addition, 302 patients in remdesivir group did not receive 10 days of treatment. Therefore, it  
56  
57 is difficult to infer that the remdesivir has resulted in recovery of patients, as average 2 days  
58  
59 of administration resulting in complete recovery of patients is impossible.  
60

1  
2  
3 The virological cure is the most important outcome which was neglected by the authors.  
4  
5 Wang et al reported no difference (percentage difference = -7.5 (95% CI = -19.2 to 4.2)) in  
6  
7 undetectable viral RNA load in remdesivir (75.6%) and placebo groups (83.1%). Patients  
8  
9 may become asymptomatic but not cured. It has been observed that asymptomatic patients  
10  
11 with RT-PCR positive test can have thromboembolic and chest CT changes. Study done by  
12  
13 Merkler et al observed that eight patients (26%) out of total 31 ischemic stroke patients  
14  
15 presented with ischemic stroke. They didn't have any COVID-19 symptoms on  
16  
17 presentation.[16]  
18  
19  
20  
21

22  
23 The SIMPLE trial[4] results published in New England Journal of Medicine does not include  
24  
25 a standard of care group. Similar to Beigel et al. virological cure was not reported.[4] Clinical  
26  
27 status at day 14 was similar in 5 day course of remdesivir as compared to 10 day course.  
28  
29 However, in comparison to standard care, 5 day group (OR 1.65 [95% CI 1.09-2.48];  
30  
31  $p=0.017$ ) showed significant improvement while 10 day group did not (OR 1.31 [95% CI  
32  
33 0.88-1.95];  $p=0.18$ ). Death reported on day 11 was similar in all three groups.[17]  
34  
35  
36  
37

38 In another study published by Grein et al.[5] on compassionate use of remdesivir did not have  
39  
40 a control arm. Hence, the conclusion that remdesivir is effective cannot be drawn as the  
41  
42 possibility of observing similar findings in control arm cannot be ruled out.  
43  
44  
45

46 Three systematic reviews and meta-analysis were published on remdesivir[18-20]. However,  
47  
48 none of the reviews have included WHO solidarity trials in review. Exclusion of such large  
49  
50 study (N=3451) decreases the power of systematic reviews. Our results are different from all  
51  
52 three systematic reviews as Wilt et al.[20] and Shrestha et al.[18] have concluded mortality  
53  
54 benefit with remdesivir while Elsayah et al.[19] concluded significant clinical improvement  
55  
56 with remdesivir as compared to standard care.  
57  
58  
59  
60

1  
2  
3 The cost of the drug is \$2340 per patient and with no mortality benefit. From a cost benefit  
4 perspective, it is our personal opinion that it should not be recommended for use, especially  
5  
6 in developing countries.[21]  
7  
8  
9

### 10 **Limitations and strengths**

11  
12  
13  
14 A major strength of our systematic review is that four RCTs were included in our analysis  
15 with total sample size of 7324 patients. Study done by Wang et al and WHO Solidarity trial  
16 has low ROB. Robust method of analysis using ROB-2 and GARDE analysis is another  
17 strength of the current systematic review.  
18  
19  
20  
21  
22  
23

### 24 **Quality of Evidence: (GRADE)**

25  
26  
27 The overall quality of systematic review is “Moderate”. Critical outcomes like mortality has  
28 moderate quality evidence. Clinical improvement was regarded as “Low”. Time to clinical  
29 improvement has “Very low” quality of evidence. Time to clinical improvement was used by  
30 regulatory agencies like US FDA for giving approval to remdesivir for treatment of severe  
31 COVID-19 patients. Hence, the quality of evidence for time to clinical improvement cannot  
32 be overlooked. This evidence suggests that further research is very likely to have an  
33 important impact on our confidence in the estimate of time to clinical improvement and likely  
34 to change the estimate. Moderate quality of evidence with regard to mortality showed that  
35 further RCTs are likely to have important impact and may change the no mortality benefit  
36 conclusion drawn from review.  
37  
38  
39  
40  
41  
42  
43  
44  
45  
46  
47  
48  
49

### 50 **Conclusion:**

51  
52  
53  
54 Evidence of our systematic review indicates no benefit in mortality rate with remdesivir, with  
55 moderate quality of evidence. Benefit does exist in terms of clinical improvement and time to  
56 clinical improvement, but the evidence is of low and very low quality. Significant decrease in  
57  
58  
59  
60



1  
2  
3 serious adverse events as compared to placebo, strengthens the evidence of more serious  
4 patients in placebo arm. No difference was shown in respiratory failure in the two groups  
5  
6 (very low quality evidence). All outcomes except mortality in our meta-analysis were  
7  
8 influenced by Beigel et al. and Spinner et al., which has high ROB. WHO solidarity trial and  
9  
10 Wang et al showed no mortality benefit, both having overall low ROB.  
11  
12  
13  
14

### 15 **Abbreviation List**

16  
17  
18  
19 COVID-Corona Virus Disease

20  
21 PRISMA - Preferred Reporting Items for Systematic Reviews and Meta-Analyses

22  
23 PROSPERO - International Prospective Register of Systematic Reviews

24  
25 ROB-2 - The Risk Of Bias -2 tool for randomized control trials

26  
27 CI: Confidence interval

28  
29 OR - Odd ratios

30  
31 HR - Hazard ratios

32  
33 GRADE pro GDT - Grades of Recommendations, Assessment, Development and Evaluations  
34 (GRADE) guideline development tool

35  
36 OIS - Optimal information size

### 37 **Declarations**

38  
39  
40 **Ethical approval and consent to participate:** Not applicable

41  
42  
43 **Consent for publication:** Not applicable

44  
45  
46  
47 **Availability of supporting Data:** The datasets used and/or analyzed during the current study  
48 are available from the corresponding author on request

49  
50  
51  
52 **Competing Interests:** Dr. SINGH has nothing to disclose. Dr. CHUGH A has nothing to  
53 disclose. Dr Khera D has nothing to disclose. Dr Khera P has nothing to disclose. Dr.  
54  
55 CHUGH V has nothing to disclose.  
56  
57

58  
59 **Funding:** None declared  
60

**Authors Contribution:**

Study design and planning of systematic review - All of the authors

Literature search - AC, SS

Figures – SS, VKC, AC

Tables - DK, SS

Data collection and analysis - SS, DK

ROB - DK, AC, SS, Query resolved by all authors

GRADE Analysis - SS, AC, DK, Query resolved by all authors

Data interpretation -, SS, DK, AC

Writing - SS, DK, AC

Corrections and Final approval of Manuscript - All of the authors

The corresponding author attests that all listed authors meet authorship criteria as per ICJME and that the manuscript is an honest, accurate, and transparent account of the study being reported

**Acknowledgements:**

We acknowledge GRADE Pro team [McMaster University and Evidence Prime Inc. available from: <https://gradepro.org/>] for letting us use the software for the synthesis and overall assessment and grading of systematic review.

## References

1. Xu Z, Shi L, Wang Y, Zhang J, Huang L, Zhang C, et al. Pathological findings of COVID-19 associated with acute respiratory distress syndrome. *Lancet Respir Med*. 2020 Apr;8(4):420-2.
2. Chen N, Zhou M, Dong X, Qu J, Gong F, Han Y, et al. Epidemiological and clinical characteristics of 99 cases of 2019 novel coronavirus pneumonia in Wuhan, China: a descriptive study. *Lancet*. 2020 Feb 15;395(10223):507-13.
3. Wang Y, Zhang D, Du G, Du R, Zhao J, Jin Y, et al. Remdesivir in adults with severe COVID-19: a randomised, double-blind, placebo-controlled, multicentre trial. *Lancet*. 2020 May 16;395(10236):1569-78.
4. Goldman JD, Lye DCB, Hui DS, Marks KM, Bruno R, Montejano R, et al. Remdesivir for 5 or 10 Days in Patients with Severe Covid-19. *N Engl J Med*. 2020 May 27.
5. Grein J, Ohmagari N, Shin D, Diaz G, Asperges E, Castagna A, et al. Compassionate Use of Remdesivir for Patients with Severe Covid-19. *N Engl J Med*. 2020 Jun 11;382(24):2327-36.
6. Sterne JA, Hernan MA, Reeves BC, Savovic J, Berkman ND, Viswanathan M, et al. ROBINS-I: a tool for assessing risk of bias in non-randomised studies of interventions. *BMJ*. 2016 Oct 12;355:i4919.
7. McGuinness LA, Higgins JPT. Risk-of-bias VISualization (robvis): An R package and Shiny web app for visualizing risk-of-bias assessments. *Res Synth Methods*. 2020 Apr 26.
8. Copenhagen: The Nordic Cochrane Centre. The Cochrane Collaboration. Review Manager (RevMan) [Computer program]. Version 5.3.

- 1  
2  
3 9. Higgins J, Green S, (Editors). Cochrane Handbook for Systematic Reviews of  
4 Interventions: The Cochrane Collaboration, 2011; 2011 [cited 2020 28 May]. Available from:  
5  
6 [www.handbook.cochrane.org](http://www.handbook.cochrane.org).  
7  
8
- 9  
10 10. Higgins JP, Thompson SG, Deeks JJ, Altman DG. Measuring inconsistency in meta-  
11 analyses. *BMJ*. 2003 Sep 6;327(7414):557-60.  
12
- 13 11. Kjaergard LL, Villumsen J, Gluud C. Reported methodologic quality and  
14 discrepancies between large and small randomized trials in meta-analyses. *Ann Intern Med*.  
15 2001 Dec 4;135(11):982-9.  
16
- 17 12. Schünemann H, Brożek J, Guyatt G, Oxman A, editors. GRADE handbook for  
18 grading quality of evidence and strength of recommendations. Updated October 2013. The  
19 GRADE Working Group, 2013. 2013. Available from: [guidelinedevelopment.org/handbook](http://guidelinedevelopment.org/handbook).  
20
- 21 13. Beigel JH, Tomashek KM, Dodd LE, Mehta AK, Zingman BS, Kalil AC, et al.  
22 Remdesivir for the Treatment of Covid-19 - Final Report. *N Engl J Med*. 2020 Oct 8.  
23
- 24 14. Pan H, Peto R, Karim QA, Alejandria M, Henao-Restrepo AM, García CH, et al.  
25 Repurposed antiviral drugs for COVID-19 –interim WHO SOLIDARITY trial results.  
26 2020:2020.10.15.20209817.  
27
- 28 15. Spinner CD, Gottlieb RL, Criner GJ, Arribas Lopez JR, Cattelan AM, Soriano  
29 Viladomiu A, et al. Effect of Remdesivir vs Standard Care on Clinical Status at 11 Days in  
30 Patients With Moderate COVID-19: A Randomized Clinical Trial. *JAMA*. 2020 Sep  
31 15;324(11):1048-57.  
32
- 33 16. Merkle AE, Parikh NS, Mir S, Gupta A, Kamel H, Lin E, et al. Risk of Ischemic  
34 Stroke in Patients With Coronavirus Disease 2019 (COVID-19) vs Patients With Influenza.  
35 *JAMA Neurol*. 2020 Jul 2.  
36
- 37 17. Gilead Announces Results From Phase 3 Trial of Remdesivir in Patients With  
38 Moderate COVID-19. Available from: <https://www.gilead.com/news-and-press/press->  
39  
40  
41  
42  
43  
44  
45  
46  
47  
48  
49  
50  
51  
52  
53  
54  
55  
56  
57  
58  
59  
60

1  
2  
3 [room/press-releases/2020/6/gilead-announces-results-from-phase-3-trial-of-remdesivir-in-](https://www.bmjopen.com/press-releases/2020/6/gilead-announces-results-from-phase-3-trial-of-remdesivir-in-patients-with-moderate-covid-19)  
4 [patients-with-moderate-covid-19.](https://www.bmjopen.com/press-releases/2020/6/gilead-announces-results-from-phase-3-trial-of-remdesivir-in-patients-with-moderate-covid-19)  
5  
6

7  
8 18. Shrestha DB, Budhathoki P, Syed NI, Rawal E, Raut S, Khadka S. Remdesivir: A  
9 potential game-changer or just a myth? A systematic review and meta-analysis. Life Sci.  
10 2020 Oct 26:118663.  
11  
12

13  
14 19. Elsayah HK, Elsokary MA, Abdallah MS, ElShafie AH. Efficacy and safety of  
15 remdesivir in hospitalized Covid-19 patients: Systematic review and meta-analysis including  
16 network meta-analysis. Rev Med Virol. 2020 Oct 31:e2187.  
17  
18

19  
20 20. Wilt TJ, Kaka AS, MacDonald R, Greer N, Obley A, Duan-Porter W. Remdesivir for  
21 Adults With COVID-19 : A Living Systematic Review for an American College of  
22 Physicians Practice Points. Ann Intern Med. 2020 Oct 5.  
23  
24  
25

26  
27 21. Rees V. Gilead prices remdesivir at \$2,340 per patient for developed countries.  
28 European Pharmaceutical Review. 30 June, 2020. Available from:  
29 [https://www.europeanpharmaceuticalreview.com/news/122592/gilead-prices-remdesivir-at-](https://www.europeanpharmaceuticalreview.com/news/122592/gilead-prices-remdesivir-at-2340-per-patient-for-developed-countries/)  
30 [2340-per-patient-for-developed-countries/.](https://www.europeanpharmaceuticalreview.com/news/122592/gilead-prices-remdesivir-at-2340-per-patient-for-developed-countries/)  
31  
32  
33  
34  
35  
36  
37  
38  
39  
40  
41  
42  
43  
44  
45  
46  
47  
48  
49  
50  
51  
52  
53  
54  
55  
56  
57  
58  
59  
60

Table 1. Characteristics of clinical studies evaluating Remdesivir for treatment of COVID-19

| Author, year (Study design)                               | Institution/ Country of study conduct                                                | Study Interventions (N)/ Regimen                                                                         | Study control (N)/ Regimen | Study population characteristics                                                                                                                                                                        | Study outcomes                                                                                                                                                                                                                                                                                                                                                                                                                                       |
|-----------------------------------------------------------|--------------------------------------------------------------------------------------|----------------------------------------------------------------------------------------------------------|----------------------------|---------------------------------------------------------------------------------------------------------------------------------------------------------------------------------------------------------|------------------------------------------------------------------------------------------------------------------------------------------------------------------------------------------------------------------------------------------------------------------------------------------------------------------------------------------------------------------------------------------------------------------------------------------------------|
| <b>Beigel et al 2020</b><br>(Randomized controlled trial) | Multicenter trial                                                                    | Remdesivir (538); 200 mg on day 1 followed by 100 mg on days 2–10 in single daily infusions              | Placebo (521)              | Hospitalized adult COVID-19 patients with evidence of lower respiratory tract involvement.                                                                                                              | <b>Time to recovery:</b> Patients in the remdesivir group had a shorter time to recovery than patients in the placebo group (median, 11 days, as compared with 15 days; rate ratio for recovery, 1.32; 95% confidence interval [CI], 1.12 to 1.55; P<0.001<br><b>Mortality:</b> Kaplan Meier estimates of mortality by 14 days were 7.1% with remdesivir and 11.9% with placebo (hazard ratio for death, 0.70; 95% CI, 0.47 to 1.04)                 |
| <b>Spinner et al</b>                                      | Multicenter trial                                                                    | Remdesivir - 10-day (n = 197), Remdesivir - 5-day (n = 199)                                              | Standard care (n = 200)    | Confirmed severe acute respiratory syndrome coronavirus 2 (SARS-CoV-2) infection and moderate COVID-19 pneumonia (pulmonary infiltrates and room-air oxygen saturation >94%)                            | <b>Day 28</b><br>Mortality rate n(%) – Remdesivir 10 day = 3(2); Remdesivir 5 day = 2(1), Standard = 4(2)<br>Clinical Improvement n(%) - Remdesivir 10 day =174(90), Remdesivir 5 day = 171(90), Standard = 166(83)                                                                                                                                                                                                                                  |
| <b>Wang et al 2020</b><br>(Randomized controlled trial)   | Department of Pulmonary and Critical Care Medicine, China-Japan Friendship Hospital, | Remdesivir (158); at least 1 dose after entering ICU; 200 mg on day 1 followed by 100 mg on days 2–10 in | Placebo (79)               | Hospitalized adult COVID-19 patients with symptom onset to enrolment interval of $\leq 12$ days, oxygen saturation $\leq 94\%$ on room air or a ratio of arterial oxygen partial pressure to fractional | <b>Time to clinical improvement within 28 days after randomization:</b> Remdesivir use was not associated with a difference in time to clinical improvement (hazard ratio 1.23 [95% CI 0.87–1.75]). Although not statistically significant, patients receiving remdesivir had a numerically faster time to clinical improvement than those receiving placebo among patients with symptom duration of 10 days or less (hazard ratio 1.52 [0.95–2.43]) |

|                                                                   |                                                                               |                                                  |                |                                                                                                                                                                   |                                                                                                                                                                                                                                                                                                             |
|-------------------------------------------------------------------|-------------------------------------------------------------------------------|--------------------------------------------------|----------------|-------------------------------------------------------------------------------------------------------------------------------------------------------------------|-------------------------------------------------------------------------------------------------------------------------------------------------------------------------------------------------------------------------------------------------------------------------------------------------------------|
|                                                                   | Beijing, China                                                                | single daily infusions                           |                | inspired oxygen of 300 mm Hg or less, and radiologically confirmed pneumonia                                                                                      | <b>28-day mortality:</b> similar between the two groups (22 [14%] died in the remdesivir group vs 10 (13%) in the placebo group; difference 1·1% [95% CI -8·1 to 10·3]).                                                                                                                                    |
| <b>WHO Solidarity Trial 2020</b><br>(Randomized controlled trial) | World Health Organization, Multicentric trial (405 hospitals in 30 countries) | Remdesivir (2743); Day 0, 200mg; days 1-9, 100mg | Placebo (2708) | Hospitalized with a diagnosis of COVID-19, age $\geq 18$ years, not known to have received any study drug, without anticipated transfer elsewhere within 72 hours | <b>Mortality rate:</b><br>Remdesivir RR=0.95 (0.81-1.11, p=0.50; 301/2743 active vs 303/2708 control).<br>Hydroxychloroquine RR=1.19 (0.89-1.59, p=0.23; 104/947 vs 84/906),<br>Lopinavir RR=1.00 (0.79-1.25, p=0.97; 148/1399 vs 146/1372)<br>Interferon RR=1.16 (0.96-1.39, p=0.11; 243/2050 vs 216/2050) |

Table 2: GRADE recommendation for primary and secondary outcomes of use of Remdesivir in COVID-19

| Certainty assessment                |                          |                      |                      |                      |                      | № of patients                     |                  | Effect                           |                                                          | Certainty Importance          |
|-------------------------------------|--------------------------|----------------------|----------------------|----------------------|----------------------|-----------------------------------|------------------|----------------------------------|----------------------------------------------------------|-------------------------------|
| № of studies                        | Risk of bias             | Inconsistency        | Indirectness         | Imprecision          | Other considerations | Efficacy and Safety of Remdesivir | placebo          | Relative (95% CI)                | Absolute (95% CI)                                        |                               |
| <b>Mortality at day 28</b>          |                          |                      |                      |                      |                      |                                   |                  |                                  |                                                          |                               |
| 4 RCT                               | not serious <sup>a</sup> | not serious          | not serious          | serious <sup>b</sup> | none                 | 387/3818 (10.1%)                  | 394/3506 (11.2%) | <b>OR 0.92</b><br>(0.79 to 1.07) | <b>8 fewer per 1,000</b><br>(from 21 fewer to 7 more)    | ⊕⊕⊕○<br>MODERATE<br>CRITICAL  |
| <b>Clinical Improvement</b>         |                          |                      |                      |                      |                      |                                   |                  |                                  |                                                          |                               |
| 3 RCT                               | serious <sup>c</sup>     | not serious          | not serious          | serious <sup>d</sup> | none                 | 782/1080 (72.4%)                  | 484/799 (60.6%)  | <b>OR 1.52</b><br>(1.24 to 1.87) | <b>94 more per 1,000</b><br>(from 50 more to 136 more)   | ⊕⊕○○<br>LOW<br>IMPORTANT      |
| <b>Time to clinical Improvement</b> |                          |                      |                      |                      |                      |                                   |                  |                                  |                                                          |                               |
| 2 RCT                               | serious <sup>e</sup>     | not serious          | serious <sup>f</sup> | serious <sup>d</sup> | none                 | -/0                               | -/0              | <b>HR 1.28</b><br>(1.12 to 1.46) | <b>1 fewer per 1,000</b><br>(from 1 fewer to 1 fewer)    | ⊕○○○<br>VERY LOW<br>IMPORTANT |
| <b>Serious Adverse events</b>       |                          |                      |                      |                      |                      |                                   |                  |                                  |                                                          |                               |
| 3 RCT                               | serious <sup>c</sup>     | not serious          | not serious          | serious <sup>d</sup> | none                 | 161/1075 (15.0%)                  | 179/800 (22.4%)  | <b>RR 0.75</b><br>(0.62 to 0.90) | <b>56 fewer per 1,000</b><br>(from 85 fewer to 22 fewer) | ⊕⊕○○<br>LOW<br>IMPORTANT      |
| <b>Respiratory Failure</b>          |                          |                      |                      |                      |                      |                                   |                  |                                  |                                                          |                               |
| 2 RCT                               | serious <sup>e</sup>     | serious <sup>g</sup> | not serious          | serious <sup>h</sup> | none                 | 44/691 (6.4%)                     | 48/600 (8.0%)    | <b>RR 0.85</b><br>(0.41 to 1.77) | <b>12 fewer per 1,000</b><br>(from 47 fewer to 62 more)  | ⊕○○○<br>VERY LOW<br>CRITICAL  |



1  
2  
3 **CI:** Confidence interval; **OR:** Odds ratio; **HR:** Hazard Ratio; **RR:** Risk ratio; RCT – Randomized controlled trials  
4

5 *Explanations*

6 a. All studies have low ROB except Biegel et al. WHO solidarity trial contributes 77.9% weight to overall effect has low ROB. Hence overall  
7 low ROB.  
8

9 b. Overall information size of 1213 was achieved in either group. However, the overall effect estimate included one, hence downgraded for  
10 imprecision  
11

12 c. Biegel et al. and Spinner et al. have a high risk of bias (ROB) due to selective reporting of results. Hence, downgraded for ROB.  
13

14 d. Overall Information Size of 1213 was not achieved in either groups. Hence, downgraded for imprecision  
15

16 e. Biegel et al. has a high risk of bias (ROB) due to selective reporting of results. Hence, downgraded for ROB.  
17

18 f. Time to clinical improvement is not a direct estimate of the patient's oriented outcomes. Hence, downgraded for evidence  
19

20 g. As  $I^2 > 50\%$ , heterogeneity is significantly high. Hence, downgraded for Inconsistency  
21

22 h. Overall information size of 1213 was not achieved in either group and the overall effect estimate included one, hence downgraded for  
23 imprecision  
24  
25  
26  
27  
28  
29  
30  
31  
32  
33  
34  
35  
36  
37  
38  
39  
40  
41  
42  
43  
44  
45  
46

## Captions for Figures

Figure 1: PRISMA flow chart depicting study selection process

Figure 2: ROB-2: Risk of bias in RCT evaluating Remdesivir for treatment of COVID-19

Figure 3: Mortality rate (3a), clinical improvement (3b) and time to clinical improvement (3c) of remdesivir vs control treatment

Figure 4: Number of patients with Serious adverse events (4a) and respiratory failure (4b) (remdesivir vs control treatment)

Supplementary Figure 1: ROB-2: Risk of bias of RCT evaluating remdesivir in COVID-19 (Weighted Summary plot)

Supplementary Figure 2: Forest plot of mortality rates in low risk (with or without O2) versus high risk (Invasive ventilation) Groups for use of remdesivir versus standard of care in COVID-19

1  
2  
3  
4  
5  
6  
7  
8  
9  
10  
11  
12  
13  
14  
15  
16  
17  
18  
19  
20  
21  
22  
23  
24  
25  
26  
27  
28  
29  
30  
31  
32  
33  
34  
35  
36  
37  
38  
39  
40  
41  
42  
43  
44  
45  
46  
47  
48  
49  
50  
51  
52  
53  
54  
55  
56  
57  
58  
59  
60

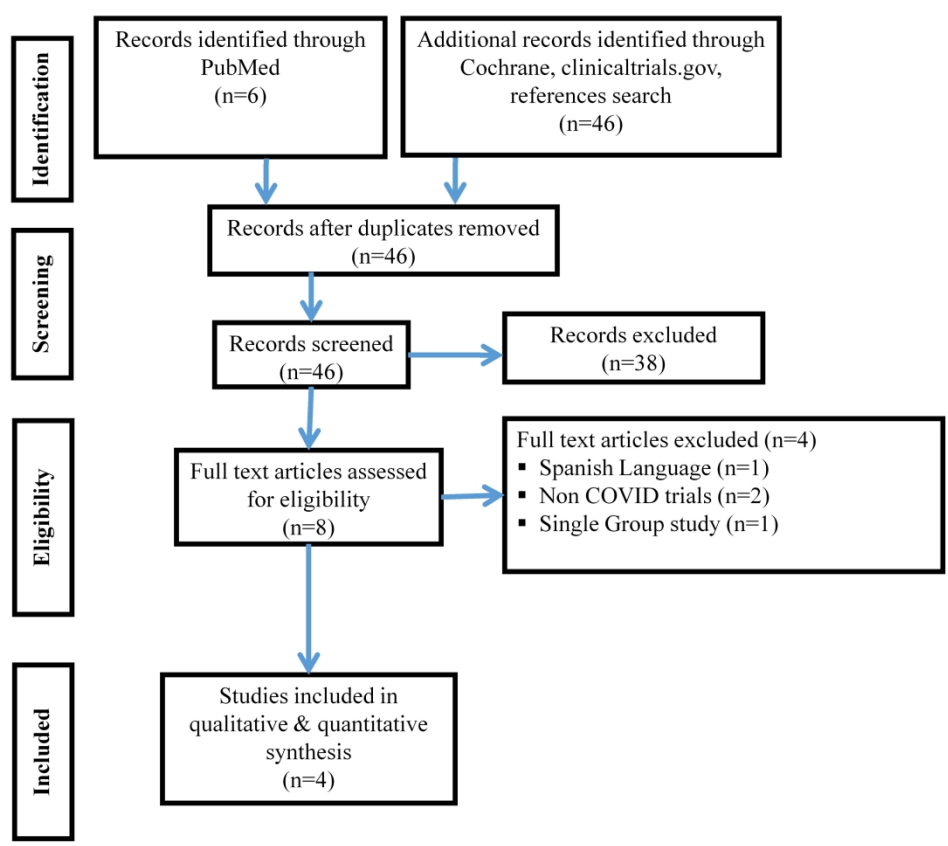

Figure 1: PRISMA flow chart depicting study selection process

254x231mm (300 x 300 DPI)

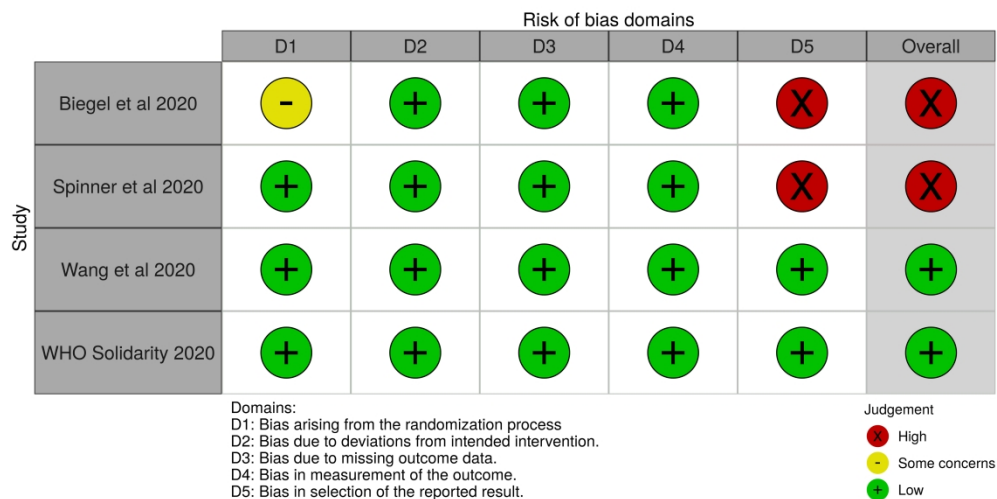

Figure 2: ROB-2: Risk of bias in RCT evaluating Remdesivir for treatment of COVID-19

227x127mm (600 x 600 DPI)

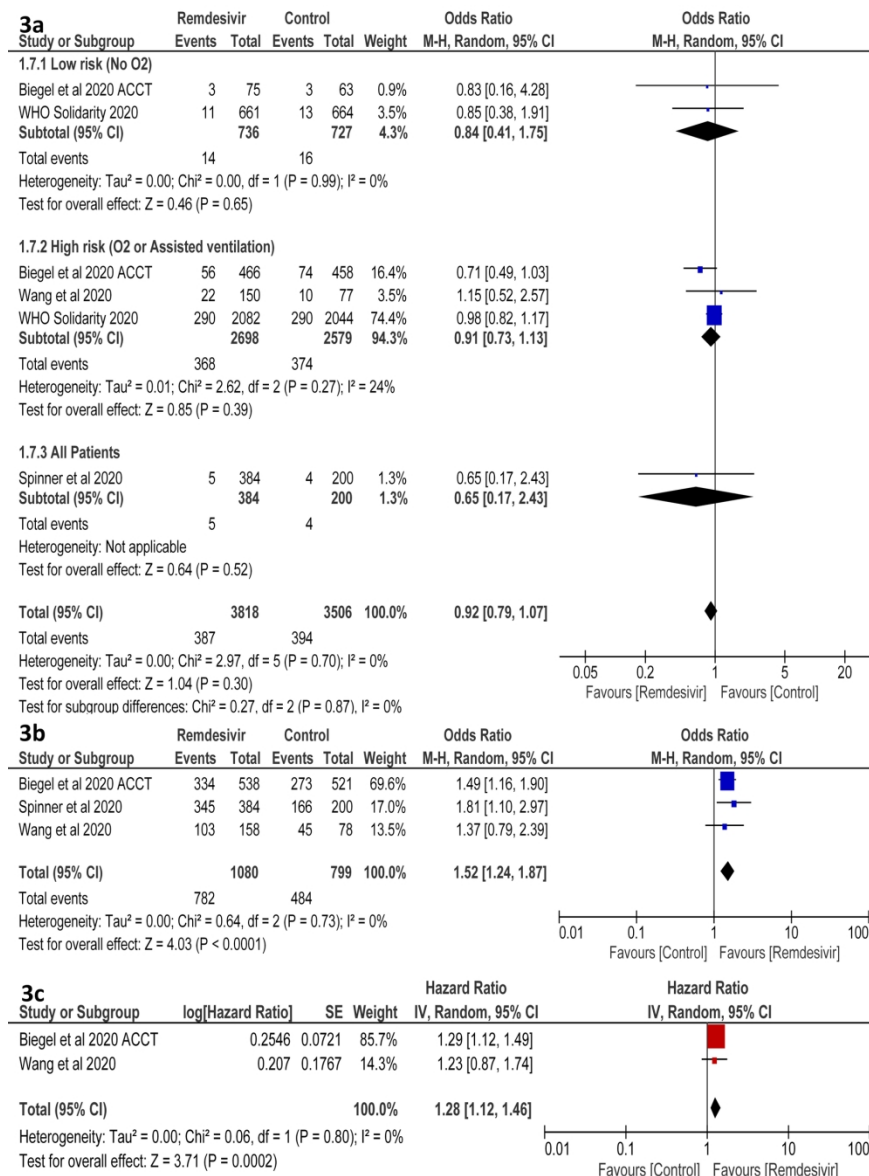

Figure 3: Mortality rate (3a), clinical improvement (3b) and time to clinical improvement (3c) of remdesivir vs control treatment

158x218mm (300 x 300 DPI)

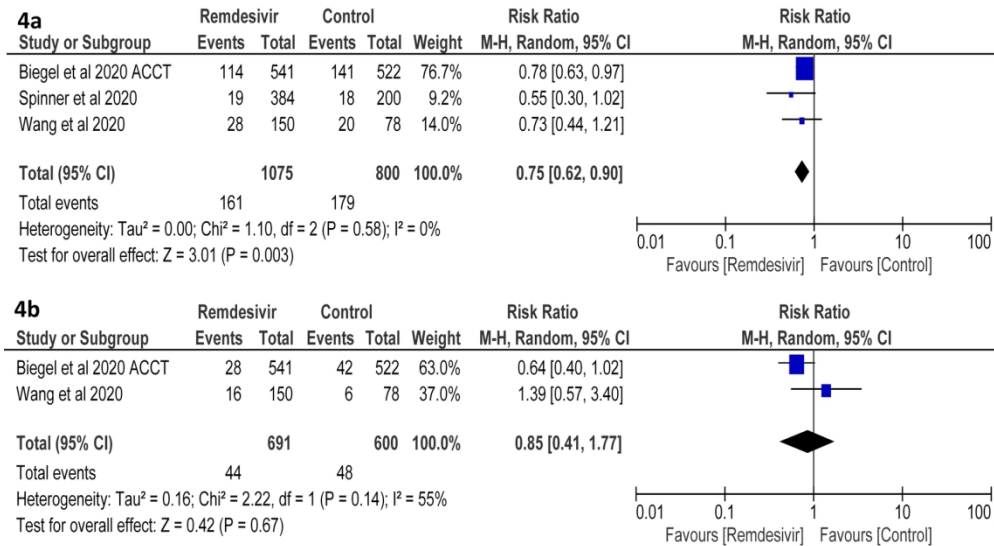

Figure 4: Number of patients with Serious adverse events (4a) and respiratory failure (4b) (remdesivir vs control treatment)

158x89mm (300 x 300 DPI)

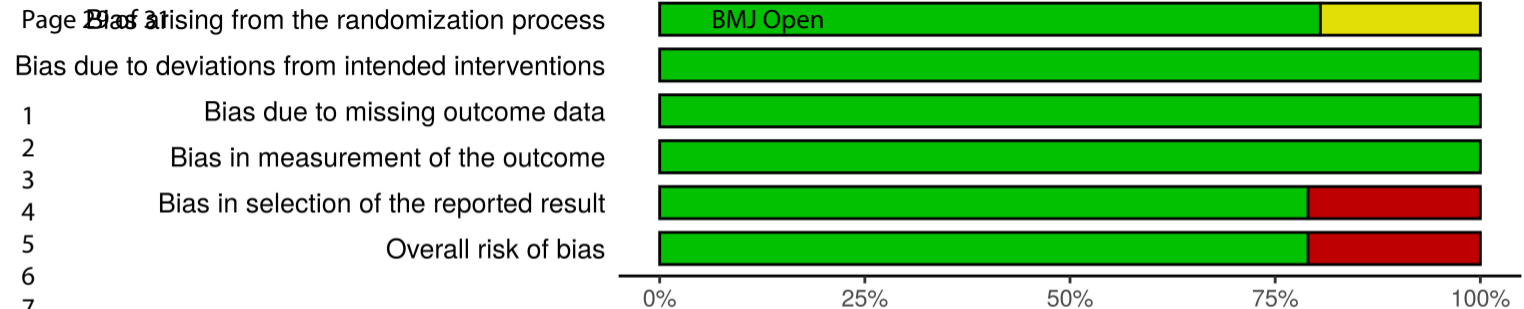

For peer review only - <http://bmjopen.bmj.com/site/about/guidelines.xhtml>

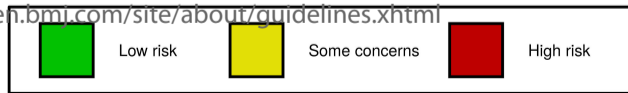

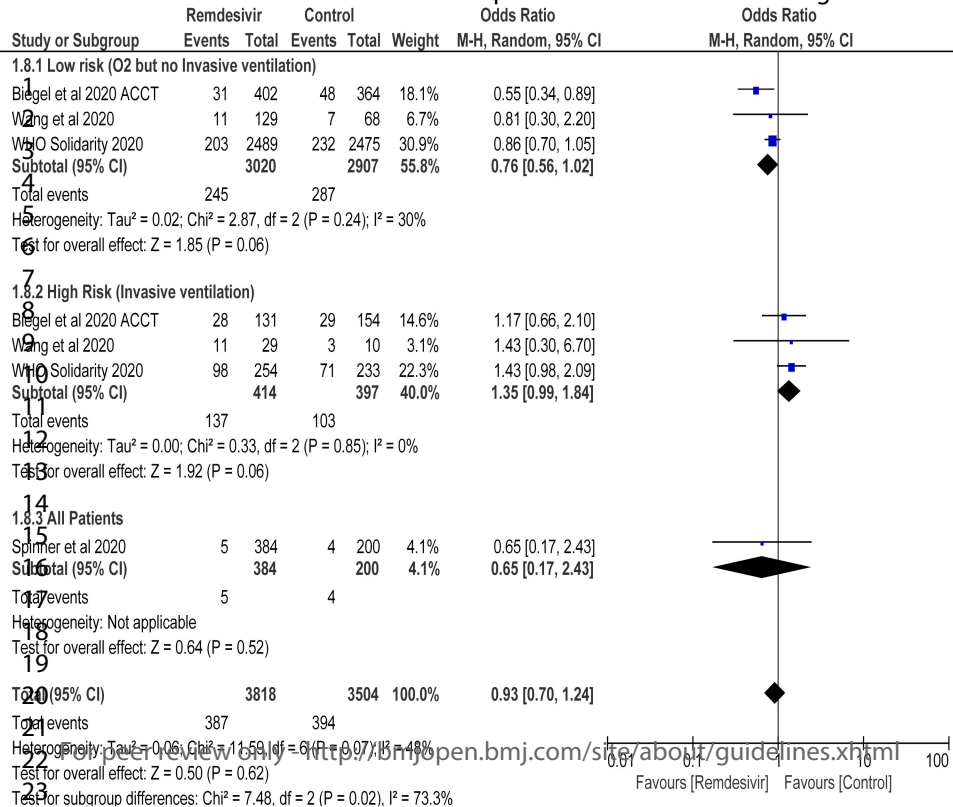

\*Invasive ventilation subgroup, Wang et al study included patients on high flow oxygen in addition to invasive ventilation



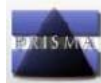

# PRISMA 2009 Checklist

| Section/topic                      | #  | Checklist item                                                                                                                                                                                                                                                                                              | Reported on page # |
|------------------------------------|----|-------------------------------------------------------------------------------------------------------------------------------------------------------------------------------------------------------------------------------------------------------------------------------------------------------------|--------------------|
| <b>TITLE</b>                       |    |                                                                                                                                                                                                                                                                                                             |                    |
| Title                              | 1  | Identify the report as a systematic review, meta-analysis, or both.                                                                                                                                                                                                                                         | 1, 3               |
| <b>ABSTRACT</b>                    |    |                                                                                                                                                                                                                                                                                                             |                    |
| Structured summary                 | 2  | Provide a structured summary including, as applicable: background; objectives; data sources; study eligibility criteria, participants, and interventions; study appraisal and synthesis methods; results; limitations; conclusions and implications of key findings; systematic review registration number. | 3-4                |
| <b>INTRODUCTION</b>                |    |                                                                                                                                                                                                                                                                                                             |                    |
| Rationale                          | 3  | Describe the rationale for the review in the context of what is already known.                                                                                                                                                                                                                              | 5                  |
| Objectives                         | 4  | Provide an explicit statement of questions being addressed with reference to participants, interventions, comparisons, outcomes, and study design (PICOS).                                                                                                                                                  | 5                  |
| <b>METHODS</b>                     |    |                                                                                                                                                                                                                                                                                                             |                    |
| Protocol and registration          | 5  | Indicate if a review protocol exists, if and where it can be accessed (e.g., Web address), and, if available, provide registration information including registration number.                                                                                                                               | 6                  |
| Eligibility criteria               | 6  | Specify study characteristics (e.g., PICOS, length of follow-up) and report characteristics (e.g., years considered, language, publication status) used as criteria for eligibility, giving rationale.                                                                                                      | 6                  |
| Information sources                | 7  | Describe all information sources (e.g., databases with dates of coverage, contact with study authors to identify additional studies) in the search and date last searched.                                                                                                                                  | 6                  |
| Search                             | 8  | Present full electronic search strategy for at least one database, including any limits used, such that it could be repeated.                                                                                                                                                                               | 6                  |
| Study selection                    | 9  | State the process for selecting studies (i.e., screening, eligibility, included in systematic review, and, if applicable, included in the meta-analysis).                                                                                                                                                   | 6                  |
| Data collection process            | 10 | Describe method of data extraction from reports (e.g., piloted forms, independently, in duplicate) and any processes for obtaining and confirming data from investigators.                                                                                                                                  | 6                  |
| Data items                         | 11 | List and define all variables for which data were sought (e.g., PICOS, funding sources) and any assumptions and simplifications made.                                                                                                                                                                       | 6                  |
| Risk of bias in individual studies | 12 | Describe methods used for assessing risk of bias of individual studies (including specification of whether this was done at the study or outcome level), and how this information is to be used in any data synthesis.                                                                                      | 7                  |
| Summary measures                   | 13 | State the principal summary measures (e.g., risk ratio, difference in means).                                                                                                                                                                                                                               | 7                  |
| Synthesis of results               | 14 | Describe the methods of handling data and combining results of studies, if done, including measures of consistency (e.g., I <sup>2</sup> ) for each meta-analysis.                                                                                                                                          | 7                  |

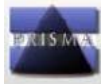

# PRISMA 2009 Checklist

Page 1 of 2

| Section/topic                 | #  | Checklist item                                                                                                                                                                                           | Reported on page # |
|-------------------------------|----|----------------------------------------------------------------------------------------------------------------------------------------------------------------------------------------------------------|--------------------|
| Risk of bias across studies   | 15 | Specify any assessment of risk of bias that may affect the cumulative evidence (e.g., publication bias, selective reporting within studies).                                                             | 7                  |
| Additional analyses           | 16 | Describe methods of additional analyses (e.g., sensitivity or subgroup analyses, meta-regression), if done, indicating which were pre-specified.                                                         | 7                  |
| <b>RESULTS</b>                |    |                                                                                                                                                                                                          |                    |
| Study selection               | 17 | Give numbers of studies screened, assessed for eligibility, and included in the review, with reasons for exclusions at each stage, ideally with a flow diagram.                                          | 8                  |
| Study characteristics         | 18 | For each study, present characteristics for which data were extracted (e.g., study size, PICOS, follow-up period) and provide the citations.                                                             | 8                  |
| Risk of bias within studies   | 19 | Present data on risk of bias of each study and, if available, any outcome level assessment (see item 12).                                                                                                | 8                  |
| Results of individual studies | 20 | For all outcomes considered (benefits or harms), present, for each study: (a) simple summary data for each intervention group (b) effect estimates and confidence intervals, ideally with a forest plot. | 8                  |
| Synthesis of results          | 21 | Present results of each meta-analysis done, including confidence intervals and measures of consistency.                                                                                                  | 8                  |
| Risk of bias across studies   | 22 | Present results of any assessment of risk of bias across studies (see Item 15).                                                                                                                          | 8                  |
| Additional analysis           | 23 | Give results of additional analyses, if done (e.g., sensitivity or subgroup analyses, meta-regression [see Item 16]).                                                                                    | 8-9                |
| <b>DISCUSSION</b>             |    |                                                                                                                                                                                                          |                    |
| Summary of evidence           | 24 | Summarize the main findings including the strength of evidence for each main outcome; consider their relevance to key groups (e.g., healthcare providers, users, and policy makers).                     | 12                 |
| Limitations                   | 25 | Discuss limitations at study and outcome level (e.g., risk of bias), and at review-level (e.g., incomplete retrieval of identified research, reporting bias).                                            | 12, 4              |
| Conclusions                   | 26 | Provide a general interpretation of the results in the context of other evidence, and implications for future research.                                                                                  | 13                 |
| <b>FUNDING</b>                |    |                                                                                                                                                                                                          |                    |
| Funding                       | 27 | Describe sources of funding for the systematic review and other support (e.g., supply of data); role of funders for the systematic review.                                                               | None               |

From: Moher D, Liberati A, Tetzlaff J, Altman DG, The PRISMA Group (2009). Preferred Reporting Items for Systematic Reviews and Meta-Analyses: The PRISMA Statement. PLoS Med 6(6): e1000097. doi:10.1371/journal.pmed1000097

For more information, visit: [www.prisma-statement.org](http://www.prisma-statement.org).

Page 2 of 2  
For peer review only - <http://bmjopen.bmj.com/site/about/guidelines.xhtml>

# BMJ Open

## Efficacy and safety of Remdesivir in COVID-19 caused by SARS-CoV-2: A systematic review and meta-analysis

|                                 |                                                                                                                                                                                                                                                                                                                                                                                                                                                                  |
|---------------------------------|------------------------------------------------------------------------------------------------------------------------------------------------------------------------------------------------------------------------------------------------------------------------------------------------------------------------------------------------------------------------------------------------------------------------------------------------------------------|
| Journal:                        | <i>BMJ Open</i>                                                                                                                                                                                                                                                                                                                                                                                                                                                  |
| Manuscript ID                   | bmjopen-2020-048416.R1                                                                                                                                                                                                                                                                                                                                                                                                                                           |
| Article Type:                   | Original research                                                                                                                                                                                                                                                                                                                                                                                                                                                |
| Date Submitted by the Author:   | 18-Apr-2021                                                                                                                                                                                                                                                                                                                                                                                                                                                      |
| Complete List of Authors:       | Singh, Surjit ; All India Institute of Medical Sciences, Department of Pharmacology<br>Khera, Daisy; All India Institute of Medical Sciences, Department of Pediatrics<br>Chugh, Ankita; All India Institute of Medical Sciences, Department of Dentistry<br>Khera, Pushpinder; All India Institute of Medical Sciences, Department of Diagnostic and Interventional Radiology<br>Chugh, Vinay; All India Institute of Medical Sciences, Department of Dentistry |
| <b>Primary Subject Heading</b>: | Infectious diseases                                                                                                                                                                                                                                                                                                                                                                                                                                              |
| Secondary Subject Heading:      | Emergency medicine, Evidence based practice, Respiratory medicine, Medical management                                                                                                                                                                                                                                                                                                                                                                            |
| Keywords:                       | COVID-19, Immunology < NATURAL SCIENCE DISCIPLINES, CLINICAL PHARMACOLOGY, Respiratory infections < THORACIC MEDICINE                                                                                                                                                                                                                                                                                                                                            |
|                                 |                                                                                                                                                                                                                                                                                                                                                                                                                                                                  |

SCHOLARONE™  
Manuscripts

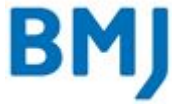

I, the Submitting Author has the right to grant and does grant on behalf of all authors of the Work (as defined in the below author licence), an exclusive licence and/or a non-exclusive licence for contributions from authors who are: i) UK Crown employees; ii) where BMJ has agreed a CC-BY licence shall apply, and/or iii) in accordance with the terms applicable for US Federal Government officers or employees acting as part of their official duties; on a worldwide, perpetual, irrevocable, royalty-free basis to BMJ Publishing Group Ltd ("BMJ") its licensees and where the relevant Journal is co-owned by BMJ to the co-owners of the Journal, to publish the Work in this journal and any other BMJ products and to exploit all rights, as set out in our [licence](#).

The Submitting Author accepts and understands that any supply made under these terms is made by BMJ to the Submitting Author unless you are acting as an employee on behalf of your employer or a postgraduate student of an affiliated institution which is paying any applicable article publishing charge ("APC") for Open Access articles. Where the Submitting Author wishes to make the Work available on an Open Access basis (and intends to pay the relevant APC), the terms of reuse of such Open Access shall be governed by a Creative Commons licence – details of these licences and which [Creative Commons](#) licence will apply to this Work are set out in our licence referred to above.

Other than as permitted in any relevant BMJ Author's Self Archiving Policies, I confirm this Work has not been accepted for publication elsewhere, is not being considered for publication elsewhere and does not duplicate material already published. I confirm all authors consent to publication of this Work and authorise the granting of this licence.

1  
2  
3 **Title: Efficacy and safety of Remdesivir in COVID-19 caused by SARS-CoV-2: A**  
4 **systematic review and meta-analysis**  
5  
6

7 **Running title :**Effectiveness of Remdesivir in COVID-19  
8

9  
10 **Authors:** Surjit Singh, D.M<sup>1</sup>, Daisy Khera, M.D<sup>2</sup>, Ankita Chugh, MDS<sup>3</sup>, Pushpinder Singh  
11  
12 Khera<sup>4</sup>, Vinay Kumar Chugh<sup>5</sup>  
13  
14

15 **Affiliations:**

16  
17 <sup>1</sup>Additional Professor, Department of Pharmacology, All India Institute of Medical  
18 Sciences, Jodhpur, India. Email id: sehmy\_ss@yahoo.com. ORCID id: 0000-0002-  
19 8990-3235.  
20  
21  
22  
23

24 <sup>2</sup>Additional Professor, Department of Pediatrics, All India Institute of Medical  
25 Sciences, Jodhpur, India. Email id: daisykhera78@gmail.com. ORCID ID: 0000-  
26 0002-2963-1370  
27  
28  
29  
30

31 <sup>3</sup>Additional Professor, Department of Dentistry, All India Institute of Medical  
32 Sciences, Jodhpur, India. Email id: [ankitamody@gmail.com](mailto:ankitamody@gmail.com).  
33  
34  
35

36 <sup>4</sup>Additional Professor, Department of Diagnostic and Interventional Radiology, All  
37 India Institute of Medical Sciences, Jodhpur, India. Email id:  
38 [pushpinderkhera@gmail.com](mailto:pushpinderkhera@gmail.com)  
39  
40  
41  
42

43 <sup>5</sup>Additional Professor, Department of Dentistry, All India Institute of Medical  
44 Sciences, Jodhpur, India. Email id: [drvinaychd@yahoo.com](mailto:drvinaychd@yahoo.com).  
45  
46  
47  
48  
49

50 Corresponding Author:  
51

52  
53 **Corresponding contributor:**

54 Dr. Ankita Chugh, MDS  
55 Additional Professor  
56 Department of Dentistry  
57 AIIMS, Jodhpur, Rajasthan - 342005  
58 E-mail – [ankitamody@gmail.com](mailto:ankitamody@gmail.com)  
59  
60

1  
2  
3  
4  
5 Total number of pages: 22  
6

7  
8 Total number of photographs: 0, Tables – 2, Figures – 4, Supplementary Figures – 2 ; Use  
9  
10 color for online printing only. For journal use black and white format of images.  
11

12  
13 Word counts - 2592  
14

15  
16 for abstract: 248  
17

18  
19 for the text: 2344  
20  
21  
22  
23  
24  
25  
26  
27  
28  
29  
30  
31  
32  
33  
34  
35  
36  
37  
38  
39  
40  
41  
42  
43  
44  
45  
46  
47  
48  
49  
50  
51  
52  
53  
54  
55  
56  
57  
58  
59  
60

For peer review only

1  
2  
3 **Title: Efficacy and safety of Remdesivir in COVID-19 caused by SARS-CoV-2: A**  
4 **systematic review and meta-analysis**  
5  
6

7  
8 **ABSTRACT**  
9

10  
11 **Objectives:** Evaluation of remdesivir, an RNA polymerase inhibitor, for effectiveness in adults  
12 with COVID-19.  
13

14  
15 **Data sources:** Electronic search for eligible articles of PubMed, Cochrane Central and  
16 clinicaltrials.gov was performed on 20<sup>th</sup> September, 2020.  
17

18  
19 **Participants & study eligibility criteria:** Only RCTs evaluating efficacy of remdesivir in  
20 COVID-19 were included for meta-analysis.  
21

22  
23 **Interventions:** Remdesivir was compared with standard of care  
24

25  
26 **Primary and secondary outcomes:** Primary outcome was mortality and secondary outcomes  
27 were time to clinical improvement and safety outcomes like serious adverse events, respiratory  
28 failure.  
29

30  
31 **Study appraisal and synthesis methods:** Data synthesis was done with Cochrane review  
32 manager 5 (RevMan) version 5.3. Cochrane risk of bias 2.0 tool was used for methodological  
33 quality assessment. The GRADE pro GDT was applied for overall quality of evidence.  
34

35  
36 **Results:** 52 RCTs were screened and 4 studies were included in analysis, with total of 7324  
37 patients. No mortality benefit was observed with remdesivir versus control group[OR=0.92  
38 (95%CI = 0.79 – 1.07), p=0.30, moderate quality evidence]. Significantly higher rates of  
39 clinical improvement [OR=1.52 (95%CI = 1.24 – 1.87), p<0.0001, low quality] and faster time  
40 to clinical improvement [HR=1.28 (95%CI = 1.12 – 1.46), p=0.0002, very low quality] was  
41 observed with remdesivir versus control group. Significant decrease was found in the risk of  
42 serious adverse events[RR=0.75 (95%CI = 0.62 – 0.90), p=0.0003, low quality], however no  
43  
44  
45  
46  
47  
48  
49  
50  
51  
52  
53  
54  
55  
56  
57  
58  
59  
60

1  
2  
3 difference was found in the risk of respiratory failure [RR=0.85 (95%CI = 0.41 – 1.77), p=0.67,  
4 very low quality evidence] with remdesivir.  
5  
6

7  
8 **Conclusions:** As per the evidence from current review, remdesivir has shown no mortality  
9 benefit (moderate quality evidence) in the treatment of COVID-19. From a cost benefit  
10 perspective, it is our personal opinion that it should not be recommended for use, especially in  
11 low and lower-middle income countries.  
12  
13  
14  
15

16  
17  
18 **Registration:** PROSPERO registration number: CRD42020189517  
19

20  
21 **Keywords:** Remdesivir, COVID-19, SARS-CoV-2  
22

## 23 **Article Summary**

### 24 **Strengths and Limitations of this study**

- 25
- 26
- 27
- 28
- 29
  - Four RCTs were included in our analysis with total sample size of 7324 patients.
  - 30
  - 31
  - 32
  - 33
  - 34
  - 35
  - 36
  - 37
  - 38
  - 39
  - 40
  - 41
  - 42
  - 43
  - 44
  - 45
  - 46
  - 47
  - 48
  - 49
  - 50
  - 51
  - 52
  - 53
  - 54
  - 55
  - 56
  - 57
  - 58
  - 59
  - 60



## INTRODUCTION

Coronavirus disease of 2019 (COVID-19), has created a pandemic all over the world [1, 2]. The global pandemic of SARS-CoV-2 infections has affected more than 141 million people world-wide and has been the cause of 3.026 million deaths globally by 18<sup>th</sup> of April 2021 as per COVID-19 statistics data. Around 120 million people have recovered and as the trend suggests most of them stay asymptomatic and few of them develop pneumonia like symptoms that does not require oxygen support [3]. A very small percentage get critical to the limit of hypoxia, acute respiratory distress syndrome and multi- organ failure. Among these critical patients who are being put on mechanical ventilation, half of them die.

The search for an effective therapy or preventive modality has become the utmost need of the hour. There are few proposed and approved drugs with some antiviral action and they are under investigation simultaneously across the globe. But as yet no proven effective therapy for SARS-CoV-2 has been accepted widely. Amongst the few promising therapies available remdesivir, a viral RNA polymerase inhibitor has been recommended by US FDA as a drug for compassionate use for treatment of COVID-19 patients. Remdesivir, a nucleoside analogue prodrug, has shown inhibitory effects on SARS-CoV-2, both in vitro and in animal models. However even for the above mentioned studies, contrasting results have been reported in different nations like China and USA [3]. Varied study designs [4, 5], genetic reasons and different treatment regimens (5 or 10 days) have been attributed for this difference.

Only two randomized controlled trials (RCT) have shown efficacy of remdesivir in COVID-19 patients. Many RCTs are undergoing to assess the benefit-risk ratio of remdesivir. Current review was planned to assess the mortality and clinical benefit in addition to safety of remdesivir in the treatment of COVID-19 caused by SARS-CoV-2.

## **METHODS**

### **Protocol and registration**

Review was done following the “PRISMA (Preferred Reporting Items for Systematic Reviews and Meta-Analyses”) statement. “PROSPERO (International Prospective Register of Systematic Reviews) database” registration was done with study number as CRD42020189517.

### **Inclusion criteria**

Exclusively RCTs evaluating role of remdesivir compared to standard care in COVID-19 were included. Observational studies, review articles, case reports or case series were excluded.

### **Search and selection of studies**

Electronic literature search was performed in PubMed, Cochrane Central Register of Controlled Trials, in addition to clinicaltrials.gov on 20<sup>th</sup> September 2020, to identify the relevant published articles. Additional Search was done in November 2020 for results of completed trials. Bibliographic search of published articles were also done manually to identify more studies. Only English language studies published were included. Search was performed using medical headings like ‘SARS-CoV-2’, ‘COVID-19’, ‘Remdesivir’, ‘COVID’, ‘novel coronavirus’. RCT restriction was applied. PubMed search strategy is given in Supplementary file 1.

After removal of duplicate articles, two independent authors reviewed the studies for inclusion in review.

### **Data extraction**

Study design, remdesivir doses and regimens, total subjects along with their characteristics, efficacy and safety outcomes were extracted and filled on a pre-structured form.

## Study Objectives

The primary objective of review was assessment of mortality (defined as deaths in each group).

The secondary outcomes were clinical improvement and virological cure. In addition, serious adverse events and other safety parameters were assessed. Cost-benefit analysis was also performed for remdesivir.

## Quality assessment

Two authors independently (DK and AC) performed risk of bias (ROB) of RCTs using Cochrane Collaboration ROB-2 [6]. Overall assessment was recorded as high, low and some concerns. Synthesis of ROB plots was done using online software Robvis (visualization tool)[7].

For publication bias assessment, funnel plot asymmetry was not assessed as studies were less than five. However, Egger's regression test was applied.

## Data synthesis and summary measures

Mortality and other outcome data were presented as odd ratios (OR) or Hazard ratio (HR) with 95% confidence intervals (CI). Synthesis of data was done using "Review Manager 5 (RevMan) Version 5.3" (Copenhagen: The Nordic Cochrane Centre, The Cochrane Collaboration, 2014)[8]. The heterogeneity among RCTs included in review was judged with  $I^2$ [9, 10]. The results of both fixed and random effect model were assessed for interpretation [9, 11].

## Quality of Evidence - GRADE Pro GDT

GRADE pro GDT (guideline development tool) software (<https://gradepro.org/>) was applied for assessment of overall quality of evidence.[12] Optimal information size (OIS) or sample

1  
2  
3 size for either group was computed to be 1213 patients. Overall GRADE assessment was  
4  
5 classified as high, moderate, low or very low [12].  
6  
7

### 8 **Patient and Public Involvement**

9  
10  
11 Patients or the public WERE NOT involved in the design, or conduct, or reporting, or  
12  
13 dissemination plans of our research.  
14  
15

## 16 **RESULTS**

### 17 **Study PRISMA flow diagram**

18  
19  
20 The RCTs included in review are depicted in PRISMA flow chart (Figure 1). Out of total 52  
21  
22 records screened, 4 RCTs [3,13-15] were included in analysis. One study was excluded as it  
23  
24 was single arm study [4], one was in Spanish language and other two were non-COVID trial  
25  
26 [16] and historical control study [17].  
27  
28  
29

### 30 **Study characteristics**

31  
32 Study characteristics of RCTs of present systematic review are mentioned in Table 1.  
33  
34

### 35 **Risk of bias (ROB)**

36  
37  
38 The overall ROB was judged as “Low”, as ROB for WHO solidarity trial[14] and Wang et  
39  
40 al.[3] was assessed as low. Study done by Beigel et al.[13] and Spinner et al.[15] was regarded  
41  
42 as having “High” ROB. Hence, ROB assessed for outcomes having data only from Beigel et  
43  
44 al. and Spinner et al. in GRADE analysis was regarded as having serious issues. The ROB of  
45  
46 RCTs is represented in Figure 2 and Supplementary Figure 1.  
47  
48

### 49 **Efficacy outcomes**

#### 50 **Mortality**

51  
52  
53 Mortality data was included from 4 RCTs with 3818 and 3506 patients in remdesivir and  
54  
55 standard of care groups, respectively. Remdesivir was found to have no mortality benefit as  
56  
57 compared to control group [OR=0.92 (95%CI = 0.79 – 1.07), p=0.30; I<sup>2</sup>=0] (Figure 3a). Sub-  
58  
59  
60

1  
2  
3 group analysis revealed no mortality benefit in low risk and high risk groups (Figure 3a,  
4  
5 Supplementary Figure 2)

### 6 7 8 **Clinical Improvement**

9  
10 Statistically significant increase in rates of clinical improvement in remdesivir versus controls  
11  
12 was observed [OR=1.52 (95%CI = 1.24 – 1.87), p<0.0001; I<sup>2</sup>=0%] (Figure 3b). Results were  
13  
14 drawn from 3 RCTs with total of 1879 patients.

### 15 16 17 **Time to clinical improvement**

18  
19 Pooled analysis revealed that there was significantly faster time to clinical improvement in  
20  
21 remdesivir group as compared to controls [HR=1.28 (95%CI = 1.12 – 1.46), p=0.0002;  
22  
23 I<sup>2</sup>=0%](Figure 3c). Data extracted from 2 RCTs with total of 1292 patients.

### 24 25 26 **Safety outcomes**

#### 27 28 **Serious Adverse Events (AE)**

29  
30 Pooled analysis revealed significant decrease in the risk of serious adverse events in remdesivir  
31  
32 group as compared to control [RR=0.75 (95%CI = 0.62 – 0.90), p=0.0003; I<sup>2</sup>=0%] (Figure 4a).  
33  
34 This data was extracted from 3 RCTs with a total of 1875 patients.

#### 35 36 37 **Respiratory Failure**

38  
39 No difference in the risk of respiratory failure between remdesivir and control groups was  
40  
41 found [RR=0.85 (95%CI = 0.41 – 1.77), p=0.67; I<sup>2</sup>=55%] (Figure 4b). Findings were derived  
42  
43 from 2 RCTs with a total of 1291 patients.

#### 44 45 46 **Cost-benefit analysis**

47  
48 The cost of remdesivir is US \$ 2340 per patient. There is lack of mortality benefit as per our  
49  
50 review.

#### 51 52 53 **Publication bias**

1  
2  
3  
4  
5  
6  
7  
8  
9  
10  
11  
12  
13  
14  
15  
16  
17  
18  
19  
20  
21  
22  
23  
24  
25  
26  
27  
28  
29  
30  
31  
32  
33  
34  
35  
36  
37  
38  
39  
40  
41  
42  
43  
44  
45  
46  
47  
48  
49  
50  
51  
52  
53  
54  
55  
56  
57  
58  
59  
60

Though the funnel plot asymmetry was not assessed, the Egger's regression test applied on four studies included in mortality rate assessment showed no publication bias ( $t = -0.5947$ ,  $p = 0.6123$ ).

### **GRADE analysis of the primary and secondary outcomes (Table 2)**

The GRADE analysis recommendation for mortality was 'Moderate' evidence quality. Though there is low ROB, low heterogeneity and direct outcome but there are serious concerns with imprecision. The quality of evidence for clinical improvement and time to clinical improvement were graded as "Low" and "Very Low" respectively. The GRADE recommendation for serious AE and respiratory failure were "Low" and "Very low" quality of evidence respectively, as there was presence of high ROB and high imprecision. The GRADE recommendation is shown in table 2.

### **Discussion**

With the existing recommendation of USFDA for compassionate use of Remdesivir in COVID patients, it is being used worldwide. Current systematic review was planned for formulating recommendation from RCTs evaluating the efficacy of remdesivir in COVID-19 patients.

In the current systematic review, the OR for mortality failed to show any significant mortality benefit with the use of remdesivir. WHO solidarity trial[14] showed no mortality benefit with the use of remdesivir. Though it was an open label study, it is less likely to have bias in assessment of objective outcome like mortality. A total of 3451 patients were included in remdesivir and standard of care groups. Subgroup analysis revealed no mortality benefit in low risk (Figure 3a - no oxygen requirement, Supplementary Figure 2 – No invasive ventilation) or

1  
2  
3 high risk (Figure 3a - oxygen requirement or assisted ventilation, Supplementary Figure 2 –  
4 Invasive ventilation) group of patients with remdesivir.  
5  
6  
7

8  
9 At the time of recruitment, more patients were on invasive mechanical ventilation or ECMO in  
10 the placebo group. There were significantly more adverse events reported in the control group  
11 in our review. This was due to the high incidence of serious AE in Beigel et al study.[13] This  
12 is rare occurrence that serious AE were significantly more in control group. The fact that more  
13 severe patients were randomized into control group in the study by Beigel et al.[13] is the major  
14 reason for this finding. Similarly, the serious AE which also included the clinical events like  
15 renal failure and respiratory failure (5.2% in remdesivir and 8% in placebo arm) were also  
16 observed more in placebo group. Despite this imbalance, remdesivir was unable to show  
17 superiority in mortality rate.  
18  
19  
20  
21  
22  
23  
24  
25  
26  
27  
28  
29

30 Sub-group analysis of Beigel et al.[13] study revealed that remdesivir resulted in significant  
31 rate of clinical improvement in COVID-19 patients on oxygen therapy, while the patients not  
32 on oxygen, or on high flow oxygen or non-invasive ventilation and receiving mechanical  
33 ventilation or ECMO had similar clinical improvement as standard of care.  
34  
35  
36  
37  
38  
39

40 Placebo used in Beigel et al.[13] study was sulfo-butyl-ether b-cyclodextrin-sodium (SBECD),  
41 used to dissolve remdesivir. The maximum recommended daily dose is approximately 250  
42 mg/kg solvent used to dissolve remdesivir.[13] The amount of solvent present in placebo was  
43 not quantified in protocol. Dose of solvent should be modified in patients with eGFR fall of  
44 more than 50% from baseline and is contraindicated in patients with eGFR less than 30ml/min.  
45 But such modification were not done in either arms. Hence the effect of solvent on patients  
46 with impaired renal function can be detrimental and cannot be ruled out.  
47  
48  
49  
50  
51  
52  
53  
54  
55  
56  
57  
58  
59  
60

1  
2  
3 In the study by Beigel et al.[13], the median time of administration of drug from randomization  
4 was nine days. Median recovery time from randomization was 11 days. In addition, 302  
5 patients in remdesivir group did not receive 10 days of treatment. Therefore, it is difficult to  
6 infer that remdesivir resulted in recovery of patients, as an average of 2 days of administration  
7 of remdesivir resulting in complete recovery of patients seems implausible.  
8  
9

10  
11  
12  
13  
14  
15  
16 Virological cure is also an important outcome which was neglected by the authors. Wang et al.  
17 reported no difference (percentage difference = -7.5 (95% CI = -19.2 to 4.2)) in undetectable  
18 viral RNA load in remdesivir (75.6%) and placebo groups (83.1%). Patients may become  
19 asymptomatic but not cured. It has been observed that asymptomatic patients with RT-PCR  
20 positive test can have thromboembolic and chest CT changes. Study done by Merkler et al.  
21 observed that eight patients (26%) out of total 31 ischemic stroke patients were COVID-19  
22 positive on RT-PCR testing. They didn't have any COVID-19 symptoms on presentation [18].  
23 Silent hypoxemia is a disturbing feature in asymptomatic COVID patients and has been found  
24 to be associated with poor outcomes [19].  
25  
26  
27  
28  
29  
30  
31  
32  
33  
34  
35

36  
37  
38 The SIMPLE trial [4] results published in New England Journal of Medicine does not include  
39 a standard of care group. Similar to Beigel et al. virological cure was not reported[4]. Clinical  
40 status at day 14 was similar in 5 day course of remdesivir as compared to 10 day course.  
41 However, in comparison to standard care, 5 day group (OR 1.65 [95% CI 1.09-2.48]; p=0.017)  
42 showed significant improvement while 10 day group did not (OR 1.31 [95% CI 0.88-1.95];  
43 p=0.18). Death reported on day 11 was similar in all three groups[20].  
44  
45  
46  
47  
48  
49  
50  
51

52  
53 In another study published by Grein et al.[5] in which compassionate use of remdesivir was  
54 done, did not have a control arm. Hence, the conclusion that remdesivir is effective cannot be  
55 drawn as the possibility of observing similar findings in control arm cannot be ruled out.  
56  
57  
58  
59  
60



1  
2  
3 Three systematic reviews and meta-analysis were published on remdesivir[21-23]. However,  
4 none of the reviews have included WHO solidarity trials in review. Exclusion of such large  
5 study (N=3451) decreases the power of systematic reviews. Our results are different from all  
6 three systematic reviews as Wilt et al.[23] and Shrestha et al.[21] have concluded mortality  
7 benefit with remdesivir while Elsayah et al.[22] concluded significant clinical improvement  
8 with remdesivir as compared to standard care. Meta-analysis performed by Solidarity trial  
9 group[14] has shown no mortality benefit (OR=0.91, 95% CI = 0.79-1.05), similar to our  
10 review. They did not perform meta-analysis with regard to other clinical endpoints and safety  
11 outcomes. Also, ROB-2 analysis of included RCTs and GRADE analysis was not applied.  
12  
13  
14  
15  
16  
17  
18  
19  
20  
21  
22  
23  
24

25 The cost of the drug is \$2340 per patient but with no mortality benefit[24]. According to World  
26 Bank data, low and lower-middle income countries have Gross National Income (GNI) per  
27 capita less than or equal to \$ 1035 and between \$ 1036 to \$ 4045, respectively.[25] As per  
28 World Health Organization Global Health Expenditure database (2018), current health  
29 expenditure per capita in low and lower-middle income countries is less than \$36 and \$ 86,  
30 respectively.[26] Therefore, from a cost benefit perspective, we are of the opinion that their  
31 use should not be recommended, especially in low and lower-middle income countries. In case  
32 of limited use, strict evidence based guidelines should be followed for optimum health benefits.  
33  
34 The cost of the drug will put extra burden on government by increasing the health cost without  
35 any benefit. Injudicious use of remdesivir without mortality benefit may also lead to increased  
36 incidence of adverse events.  
37  
38  
39  
40  
41  
42  
43  
44  
45  
46  
47  
48  
49  
50

### 51 **Limitations and strengths**

52  
53

54 A major strength of our systematic review is that four RCTs were included in our analysis with  
55 total sample size of 7324 patients. Study done by Wang et al and WHO Solidarity trial has low  
56  
57  
58  
59  
60

1  
2  
3 ROB. Robust method of analysis using ROB-2 and GRADE analysis is another strength of the  
4  
5 current systematic review.  
6  
7

### 8 9 **Quality of Evidence: (GRADE)**

10  
11 The overall quality of systematic review is “Moderate”. Critical outcomes like mortality has  
12 moderate quality evidence. Clinical improvement was regarded as “Low”. Time to clinical  
13 improvement has “Very low” quality of evidence. Time to clinical improvement was used by  
14 regulatory agencies like US FDA for giving approval to remdesivir for treatment of severe  
15 COVID-19 patients. However, the quality of evidence for time to clinical improvement cannot  
16 be overlooked. This evidence suggests that further research is very likely to have an important  
17 impact on our confidence in the estimate of time to clinical improvement and likely to change  
18 the estimate. Moderate quality of evidence with regard to mortality showed that further RCTs  
19 are likely to have important impact and may change the no mortality benefit conclusion drawn  
20 from review.  
21  
22  
23  
24  
25  
26  
27  
28  
29  
30  
31  
32  
33

### 34 35 **Conclusion:**

36  
37 Evidence of our systematic review indicates no benefit in mortality rate with remdesivir, with  
38 moderate quality of evidence. Benefit does exist in terms of rates of clinical improvement and  
39 faster time to clinical improvement in favour of remdesivir, but the evidence is of low and very  
40 low quality, respectively. Significant decrease in serious adverse events as compared to  
41 placebo, strengthens the evidence of more serious patients in placebo arm. No difference was  
42 shown in respiratory failure in the two groups (very low quality evidence). All outcomes except  
43 mortality in our meta-analysis were influenced by Beigel et al. and Spinner et al., which has  
44 high ROB. WHO solidarity trial and Wang et al showed no mortality benefit, both having  
45 overall low ROB.  
46  
47  
48  
49  
50  
51  
52  
53  
54  
55  
56  
57  
58  
59

### 60 **Abbreviation List**

1  
2  
3  
4  
5 COVID-Corona Virus Disease

6  
7 PRISMA - Preferred Reporting Items for Systematic Reviews and Meta-Analyses

8  
9 PROSPERO - International Prospective Register of Systematic Reviews

10  
11 ROB-2 - The Risk of Bias -2 tool for randomized control trials

12  
13 CI: Confidence interval

14  
15 OR - Odd ratios

16  
17 HR - Hazard ratios

18  
19 GRADE pro GDT - Grades of Recommendations, Assessment, Development and Evaluations  
20 (GRADE) guideline development tool

21  
22 OIS - Optimal information size

### 23 24 **Declarations**

25  
26  
27 **Ethical approval and consent to participate:** Not applicable

28  
29  
30 **Consent for publication:** Not applicable

31  
32  
33 **Availability of supporting Data:** The datasets used and/or analyzed during the current study  
34 are available from the corresponding author on request

35  
36  
37  
38 **Competing Interests:** Dr. SINGH has nothing to disclose. Dr. CHUGH A has nothing to  
39 disclose. Dr Khera D has nothing to disclose. Dr Khera P has nothing to disclose. Dr.  
40  
41  
42 CHUGH V has nothing to disclose.

43  
44  
45 **Funding:** None declared

### 46 47 48 **Authors Contribution:**

49  
50 Study design and planning of systematic review - All of the authors

51  
52 Literature search - AC, SS, PSK

53  
54 Figures – SS, VKC, AC

55  
56 Tables - DK, SS

57  
58 Data collection and analysis - SS, DK

59  
60 ROB - DK, AC, SS, Query resolved by all authors

1  
2  
3 GRADE Analysis - SS, AC, DK, Query resolved by all authors

4  
5 Data interpretation -, SS, DK, AC

6  
7 Writing - SS, DK, AC, PSK

8  
9 Corrections and Final approval of Manuscript - All of the authors

10 The corresponding author attests that all listed authors meet authorship criteria as per ICJME  
11 and that the manuscript is an honest, accurate, and transparent account of the study being  
12 reported  
13  
14

15 **Acknowledgements:**

16  
17  
18 We acknowledge GRADE Pro team [McMaster University and Evidence Prime Inc. available  
19 from: <https://gradepro.org/>] for letting us use the software for the synthesis and overall  
20 assessment and grading of systematic review.  
21  
22  
23  
24  
25  
26  
27  
28  
29  
30  
31  
32  
33  
34  
35  
36  
37  
38  
39  
40  
41  
42  
43  
44  
45  
46  
47  
48  
49  
50  
51  
52  
53  
54  
55  
56  
57  
58  
59  
60

## References

1. Xu Z, Shi L, Wang Y, Zhang J, Huang L, Zhang C, et al. Pathological findings of COVID-19 associated with acute respiratory distress syndrome. *Lancet Respir Med*. 2020 Apr;8(4):420-2.
2. Chen N, Zhou M, Dong X, Qu J, Gong F, Han Y, et al. Epidemiological and clinical characteristics of 99 cases of 2019 novel coronavirus pneumonia in Wuhan, China: a descriptive study. *Lancet*. 2020 Feb 15;395(10223):507-13.
3. Wang Y, Zhang D, Du G, Du R, Zhao J, Jin Y, et al. Remdesivir in adults with severe COVID-19: a randomised, double-blind, placebo-controlled, multicentre trial. *Lancet*. 2020 May 16;395(10236):1569-78.
4. Goldman JD, Lye DCB, Hui DS, Marks KM, Bruno R, Montejano R, et al. Remdesivir for 5 or 10 Days in Patients with Severe Covid-19. *N Engl J Med*. 2020 May 27.
5. Grein J, Ohmagari N, Shin D, Diaz G, Asperges E, Castagna A, et al. Compassionate Use of Remdesivir for Patients with Severe Covid-19. *N Engl J Med*. 2020 Jun 11;382(24):2327-36.
6. Sterne JA, Hernan MA, Reeves BC, Savovic J, Berkman ND, Viswanathan M, et al. ROBINS-I: a tool for assessing risk of bias in non-randomised studies of interventions. *BMJ*. 2016 Oct 12;355:i4919.
7. McGuinness LA, Higgins JPT. Risk-of-bias VISualization (robvis): An R package and Shiny web app for visualizing risk-of-bias assessments. *Res Synth Methods*. 2020 Apr 26.
8. Copenhagen: The Nordic Cochrane Centre. The Cochrane Collaboration. Review Manager (RevMan) [Computer program]. Version 5.3.
9. Higgins J, Green S, (Editors). *Cochrane Handbook for Systematic Reviews of Interventions*: The Cochrane Collaboration, 2011; 2011 [cited 2020 28 May]. Available from: [www.handbook.cochrane.org](http://www.handbook.cochrane.org).

10. Higgins JP, Thompson SG, Deeks JJ, Altman DG. Measuring inconsistency in meta-analyses. *BMJ*. 2003 Sep 6;327(7414):557-60.
11. Kjaergard LL, Villumsen J, Gluud C. Reported methodologic quality and discrepancies between large and small randomized trials in meta-analyses. *Ann Intern Med*. 2001 Dec 4;135(11):982-9.
12. Schünemann H, Brożek J, Guyatt G, Oxman A, editors. *GRADE handbook for grading quality of evidence and strength of recommendations*. Updated October 2013. The GRADE Working Group, 2013. 2013. Available from: [guidelinedevelopment.org/handbook](http://guidelinedevelopment.org/handbook).
13. Beigel JH, Tomashek KM, Dodd LE, Mehta AK, Zingman BS, Kalil AC, et al. Remdesivir for the Treatment of Covid-19 - Final Report. *N Engl J Med*. 2020 Oct 8.
14. Pan H, Peto R, Karim QA, Alejandria M, Henao-Restrepo AM, García CH, et al. Repurposed antiviral drugs for COVID-19 –interim WHO SOLIDARITY trial results. *Lancet*. 2020:2020.10.15.20209817.
15. Spinner CD, Gottlieb RL, Criner GJ, Arribas Lopez JR, Cattelan AM, Soriano Viladomiu A, et al. Effect of Remdesivir vs Standard Care on Clinical Status at 11 Days in Patients With Moderate COVID-19: A Randomized Clinical Trial. *JAMA*. 2020 Sep 15;324(11):1048-57.
16. Mulangu S, Dodd LE, Davey RT, Tshiani Mbaya O, Proschan M, Mukadi D, et al. A Randomized, Controlled Trial of Ebola Virus Disease Therapeutics. *New England journal of medicine*. [Comparative Study; Journal Article; Multicenter Study; Randomized Controlled Trial; Research Support, N.I.H., Extramural; Research Support, Non-U.S. Gov't; Research Support, U.S. Gov't, Non-P.H.S.; Research Support, U.S. Gov't, P.H.S.]. 2019;381(24):2293-303.

- 1  
2  
3 17. Olender SA, Perez KK, Go AS, Balani B, Price-Haywood EG, Shah NS, et al.  
4 Remdesivir for Severe COVID-19 versus a Cohort Receiving Standard of Care. *Clinical*  
5 *infectious diseases*. [Journal: Article in Press]. 2020.  
6  
7  
8  
9  
10 18. Merkler AE, Parikh NS, Mir S, Gupta A, Kamel H, Lin E, et al. Risk of Ischemic Stroke  
11 in Patients With Coronavirus Disease 2019 (COVID-19) vs Patients With Influenza. *JAMA*  
12 *Neurol*. 2020 Jul 2.  
13  
14  
15  
16  
17 19. Brouqui P, Amrane S, Million M, Cortaredona S, Parola P, Lagier JC, et al.  
18 Asymptomatic hypoxia in COVID-19 is associated with poor outcome. *Int J Infect Dis*. 2021  
19 Jan;102:233-8.  
20  
21  
22  
23  
24 20. Gilead Announces Results From Phase 3 Trial of Remdesivir in Patients With Moderate  
25 COVID-19. Available from: [https://www.gilead.com/news-and-press/press-room/press-](https://www.gilead.com/news-and-press/press-room/press-releases/2020/6/gilead-announces-results-from-phase-3-trial-of-remdesivir-in-patients-with-moderate-covid-19)  
26 [releases/2020/6/gilead-announces-results-from-phase-3-trial-of-remdesivir-in-patients-with-](https://www.gilead.com/news-and-press/press-room/press-releases/2020/6/gilead-announces-results-from-phase-3-trial-of-remdesivir-in-patients-with-moderate-covid-19)  
27 [moderate-covid-19](https://www.gilead.com/news-and-press/press-room/press-releases/2020/6/gilead-announces-results-from-phase-3-trial-of-remdesivir-in-patients-with-moderate-covid-19).  
28  
29  
30  
31  
32  
33 21. Shrestha DB, Budhathoki P, Syed NI, Rawal E, Raut S, Khadka S. Remdesivir: A  
34 potential game-changer or just a myth? A systematic review and meta-analysis. *Life Sci*. 2020  
35 Oct 26:118663.  
36  
37  
38  
39  
40 22. Elsayah HK, Elsokary MA, Abdallah MS, ElShafie AH. Efficacy and safety of  
41 remdesivir in hospitalized Covid-19 patients: Systematic review and meta-analysis including  
42 network meta-analysis. *Rev Med Virol*. 2020 Oct 31:e2187.  
43  
44  
45  
46  
47 23. Wilt TJ, Kaka AS, MacDonald R, Greer N, Obley A, Duan-Porter W. Remdesivir for  
48 Adults With COVID-19 : A Living Systematic Review for an American College of Physicians  
49 Practice Points. *Ann Intern Med*. 2020 Oct 5.  
50  
51  
52  
53  
54 24. Rees V. Gilead prices remdesivir at \$2,340 per patient for developed countries.  
55 *European Pharmaceutical Review*. 30 June, 2020. Available from:  
56  
57  
58  
59  
60

1  
2  
3 [https://www.europeanpharmaceuticalreview.com/news/122592/gilead-prices-remdesivir-at-](https://www.europeanpharmaceuticalreview.com/news/122592/gilead-prices-remdesivir-at-2340-per-patient-for-developed-countries/)  
4 [2340-per-patient-for-developed-countries/](https://www.europeanpharmaceuticalreview.com/news/122592/gilead-prices-remdesivir-at-2340-per-patient-for-developed-countries/).

7  
8 25. World Bank. World Development Indicators. World Bank Country and lending groups.  
9  
10 (2021). Retrieved from:[https://datahelpdesk.worldbank.org/knowledgebase/articles/906519-](https://datahelpdesk.worldbank.org/knowledgebase/articles/906519-world-bank-country-and-lending-groups#:~:text=For%20the%20current%202021%20fiscal,those%20with%20a%20GNI%20per)  
11 [world-bank-country-and-lending-](https://datahelpdesk.worldbank.org/knowledgebase/articles/906519-world-bank-country-and-lending-groups#:~:text=For%20the%20current%202021%20fiscal,those%20with%20a%20GNI%20per)  
12 [groups#:~:text=For%20the%20current%202021%20fiscal,those%20with%20a%20GNI%20p](https://datahelpdesk.worldbank.org/knowledgebase/articles/906519-world-bank-country-and-lending-groups#:~:text=For%20the%20current%202021%20fiscal,those%20with%20a%20GNI%20per)  
13 [er.](https://datahelpdesk.worldbank.org/knowledgebase/articles/906519-world-bank-country-and-lending-groups#:~:text=For%20the%20current%202021%20fiscal,those%20with%20a%20GNI%20per)  
14  
15  
16  
17  
18

19 26. World Bank. World Development Indicators. World Health Organization Global  
20 Health Expenditure database ( [apps.who.int/nha/database](https://apps.who.int/nha/database) ). (2018). Retrieved from:  
21 <https://data.worldbank.org/indicator/SH.XPD.CHEX.PC.CD?locations=XM>.  
22  
23  
24  
25  
26  
27  
28  
29  
30  
31  
32  
33  
34  
35  
36  
37  
38  
39  
40  
41  
42  
43  
44  
45  
46  
47  
48  
49  
50  
51  
52  
53  
54  
55  
56  
57  
58  
59  
60



Table 1. Characteristics of clinical studies evaluating Remdesivir for treatment of COVID-19

| Author, year (Study design)                               | Institution/ Country of study conduct                                                | Study Interventions (N)/ Regimen                                                                         | Study control (N)/ Regimen | Study population characteristics                                                                                                                                                                                                | Study outcomes                                                                                                                                                                                                                                                                                                                                                                                                                                       |
|-----------------------------------------------------------|--------------------------------------------------------------------------------------|----------------------------------------------------------------------------------------------------------|----------------------------|---------------------------------------------------------------------------------------------------------------------------------------------------------------------------------------------------------------------------------|------------------------------------------------------------------------------------------------------------------------------------------------------------------------------------------------------------------------------------------------------------------------------------------------------------------------------------------------------------------------------------------------------------------------------------------------------|
| <b>Beigel et al 2020</b><br>(Randomized controlled trial) | Multicenter trial                                                                    | Remdesivir (538); 200 mg on day 1 followed by 100 mg on days 2–10 in single daily infusions              | Placebo (521)              | Hospitalized adults COVID-19 patients with evidence of lower respiratory tract involvement.                                                                                                                                     | <b>Time to recovery:</b> Patients in the remdesivir group had a shorter time to recovery than patients in the placebo group (median, 11 days, as compared with 15 days; rate ratio for recovery, 1.32; 95% confidence interval [CI], 1.12 to 1.55; P<0.001<br><b>Mortality:</b> Kaplan Meier estimates of mortality by 14 days were 7.1% with remdesivir and 11.9% with placebo (hazard ratio for death, 0.70; 95% CI, 0.47 to 1.04)                 |
| <b>Spinner et al</b><br>(Randomized controlled trial)     | Multicenter trial                                                                    | Remdesivir - 10-day (n = 197), Remdesivir - 5-day (n = 199)                                              | Standard care (n = 200)    | Confirmed severe acute respiratory syndrome coronavirus 2 (SARS-CoV-2) infection and moderate COVID-19 pneumonia (pulmonary infiltrates and room-air oxygen saturation >94%)                                                    | <b>Day 28</b><br>Mortality rate n(%) – Remdesivir 10 day = 3(2); Remdesivir 5 day = 2(1), Standard = 4(2)<br>Clinical Improvement n(%) - Remdesivir 10 day = 174(90), Remdesivir 5 day = 171(90), Standard = 166(83)                                                                                                                                                                                                                                 |
| <b>Wang et al 2020</b><br>(Randomized controlled trial)   | Department of Pulmonary and Critical Care Medicine, China-Japan Friendship Hospital, | Remdesivir (158); at least 1 dose after entering ICU; 200 mg on day 1 followed by 100 mg on days 2–10 in | Placebo (79)               | Hospitalized adults COVID-19 patients with symptom onset to enrolment interval of $\leq 12$ days, oxygen saturation $\leq 94\%$ on room air or a ratio of arterial oxygen partial pressure to fractional inspired oxygen of 300 | <b>Time to clinical improvement within 28 days after randomization:</b> Remdesivir use was not associated with a difference in time to clinical improvement (hazard ratio 1.23 [95% CI 0.87–1.75]). Although not statistically significant, patients receiving remdesivir had a numerically faster time to clinical improvement than those receiving placebo among patients with symptom duration of 10 days or less (hazard ratio 1.52 [0.95–2.43]) |

1  
2  
3  
4  
5  
6  
7  
8  
9  
10  
11  
12  
13  
14  
15  
16  
17  
18  
19  
20  
21  
22  
23  
24  
25  
26  
27  
28  
29  
30  
31  
32  
33  
34  
35  
36  
37  
38  
39  
40  
41  
42  
43  
44  
45  
46

|                                                                |                                                                               |                                                  |                |                                                                                                                                                             |                                                                                                                                                                                                                                                                                                             |
|----------------------------------------------------------------|-------------------------------------------------------------------------------|--------------------------------------------------|----------------|-------------------------------------------------------------------------------------------------------------------------------------------------------------|-------------------------------------------------------------------------------------------------------------------------------------------------------------------------------------------------------------------------------------------------------------------------------------------------------------|
|                                                                | Beijing, China                                                                | single daily infusions                           |                | mm Hg or less, and radiologically confirmed pneumonia                                                                                                       | <b>28-day mortality:</b> similar between the two groups (22 [14%] died in the remdesivir group vs 10 (13%) in the placebo group; difference 1.1% [95% CI -0.8 to 3.0]).                                                                                                                                     |
| <b>WHO Solidarity Trial 2020</b> (Randomized controlled trial) | World Health Organization, Multicentric trial (405 hospitals in 30 countries) | Remdesivir (2743); Day 0, 200mg; days 1-9, 100mg | Placebo (2708) | Hospitalized with a diagnosis of COVID-19, age ≥18 years, not known to have received any study drug, without anticipated transfer elsewhere within 72 hours | <b>Mortality rate:</b><br>Remdesivir RR=0.95 (0.81-1.11, p=0.50; 301/2743 active vs 303/2708 control).<br>Hydroxychloroquine RR=1.19 (0.89-1.59, p=0.23; 104/947 vs 84/906),<br>Lopinavir RR=1.00 (0.79-1.25, p=0.97; 148/1399 vs 146/1372)<br>Interferon RR=1.16 (0.96-1.39, p=0.11; 243/2050 vs 216/2050) |

Table 2: GRADE recommendation for primary and secondary outcomes of use of Remdesivir in COVID-19

| Certainty assessment                |                          |                      |                      |                      |                      | № of patients                     |                  | Effect                           |                                                          | Certainty Importance          |
|-------------------------------------|--------------------------|----------------------|----------------------|----------------------|----------------------|-----------------------------------|------------------|----------------------------------|----------------------------------------------------------|-------------------------------|
| № of studies<br>Study design        | Risk of bias             | Inconsistency        | Indirectness         | Imprecision          | Other considerations | Efficacy and Safety of Remdesivir | placebo          | Relative (95% CI)                | Absolute (95% CI)                                        |                               |
| <b>Mortality at day 28</b>          |                          |                      |                      |                      |                      |                                   |                  |                                  |                                                          |                               |
| 4 RCT                               | not serious <sup>a</sup> | not serious          | not serious          | serious <sup>b</sup> | none                 | 387/3818 (10.1%)                  | 394/3506 (11.2%) | <b>OR 0.92</b><br>(0.79 to 1.07) | <b>8 fewer per 1,000</b><br>(from 21 fewer to 7 more)    | ⊕⊕⊕○<br>MODERATE<br>CRITICAL  |
| <b>Clinical Improvement</b>         |                          |                      |                      |                      |                      |                                   |                  |                                  |                                                          |                               |
| 3 RCT                               | serious <sup>c</sup>     | not serious          | not serious          | serious <sup>d</sup> | none                 | 782/1080 (72.4%)                  | 484/799 (60.6%)  | <b>OR 1.52</b><br>(1.24 to 1.87) | <b>94 more per 1,000</b><br>(from 50 more to 136 more)   | ⊕⊕○○<br>LOW<br>IMPORTANT      |
| <b>Time to clinical Improvement</b> |                          |                      |                      |                      |                      |                                   |                  |                                  |                                                          |                               |
| 2 RCT                               | serious <sup>e</sup>     | not serious          | serious <sup>f</sup> | serious <sup>d</sup> | none                 | -/0                               | -/0              | <b>HR 1.28</b><br>(1.12 to 1.46) | <b>1 fewer per 1,000</b><br>(from 1 fewer to 1 fewer)    | ⊕○○○<br>VERY LOW<br>IMPORTANT |
| <b>Serious Adverse events</b>       |                          |                      |                      |                      |                      |                                   |                  |                                  |                                                          |                               |
| 3 RCT                               | serious <sup>c</sup>     | not serious          | not serious          | serious <sup>d</sup> | none                 | 161/1075 (15.0%)                  | 179/800 (22.4%)  | <b>RR 0.75</b><br>(0.62 to 0.90) | <b>56 fewer per 1,000</b><br>(from 85 fewer to 22 fewer) | ⊕⊕○○<br>LOW<br>IMPORTANT      |
| <b>Respiratory Failure</b>          |                          |                      |                      |                      |                      |                                   |                  |                                  |                                                          |                               |
| 2 RCT                               | serious <sup>e</sup>     | serious <sup>g</sup> | not serious          | serious <sup>h</sup> | none                 | 44/691 (6.4%)                     | 48/600 (8.0%)    | <b>RR 0.85</b><br>(0.41 to 1.77) | <b>12 fewer per 1,000</b><br>(from 47 fewer to 62 more)  | ⊕○○○<br>VERY LOW<br>CRITICAL  |

1  
2  
3 **CI:** Confidence interval; **OR:** Odds ratio; **HR:** Hazard Ratio; **RR:** Risk ratio; RCT – Randomized controlled trials  
4

5  
6 *Explanations*

7 a. All studies have low ROB except Biegel and Spinner et al. WHO solidarity trial contributing 77.9% weight to overall effect has low ROB.  
8 Hence overall low ROB.

9  
10 b. Overall information size of 1213 was achieved in either group. However, the overall effect estimate included one, hence downgraded for  
11 imprecision.

12  
13 c. Biegel et al. and Spinner et al. have a high risk of bias (ROB) due to selective reporting of results. Hence, downgraded for ROB.

14  
15 d. Overall Information Size of 1213 was not achieved in either groups. Hence, downgraded for imprecision.

16  
17 e. Biegel et al. has a high risk of bias (ROB) due to selective reporting of results. Hence, downgraded for ROB.

18  
19 f. Time to clinical improvement is not a direct estimate of the patient's oriented outcomes. Hence, downgraded for evidence.

20  
21 g. As  $I^2 > 50\%$ , heterogeneity is significantly high. Hence, downgraded for inconsistency

22  
23 h. Overall information size of 1213 was not achieved in either group and the overall effect estimate included one, hence downgraded for  
24 imprecision.  
25  
26  
27  
28  
29  
30  
31  
32  
33  
34  
35  
36  
37  
38  
39  
40  
41  
42  
43  
44  
45  
46

## Captions for Figures

Figure 1: PRISMA flow chart depicting study selection process

Figure 2: ROB-2: Risk of bias in RCT evaluating Remdesivir for treatment of COVID-19

Figure 3: Mortality rate (3a), clinical improvement (3b) and time to clinical improvement (3c) of remdesivir vs control treatment

Figure 4: Number of patients with Serious adverse events (4a) and respiratory failure (4b) (remdesivir vs control treatment)

Supplementary Figure 1: ROB-2: Risk of bias of RCT evaluating remdesivir in COVID-19 (Weighted Summary plot)

Supplementary Figure 2: Forest plot of mortality rates in low risk (with or without O2) versus high risk (Invasive ventilation) Groups for use of remdesivir versus standard of care in COVID-19

1  
2  
3  
4  
5  
6  
7  
8  
9  
10  
11  
12  
13  
14  
15  
16  
17  
18  
19  
20  
21  
22  
23  
24  
25  
26  
27  
28  
29  
30  
31  
32  
33  
34  
35  
36  
37  
38  
39  
40  
41  
42  
43  
44  
45  
46  
47  
48  
49  
50  
51  
52  
53  
54  
55  
56  
57  
58  
59  
60

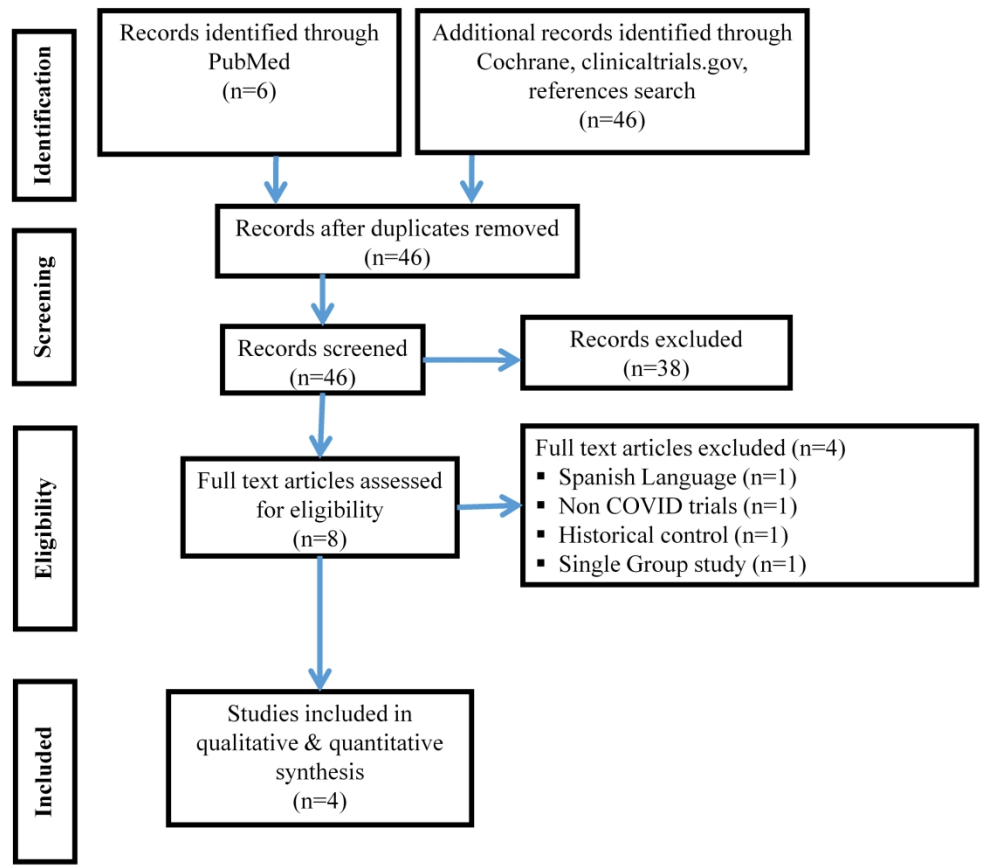

Figure 1: PRISMA flow chart depicting study selection process  
254x227mm (300 x 300 DPI)

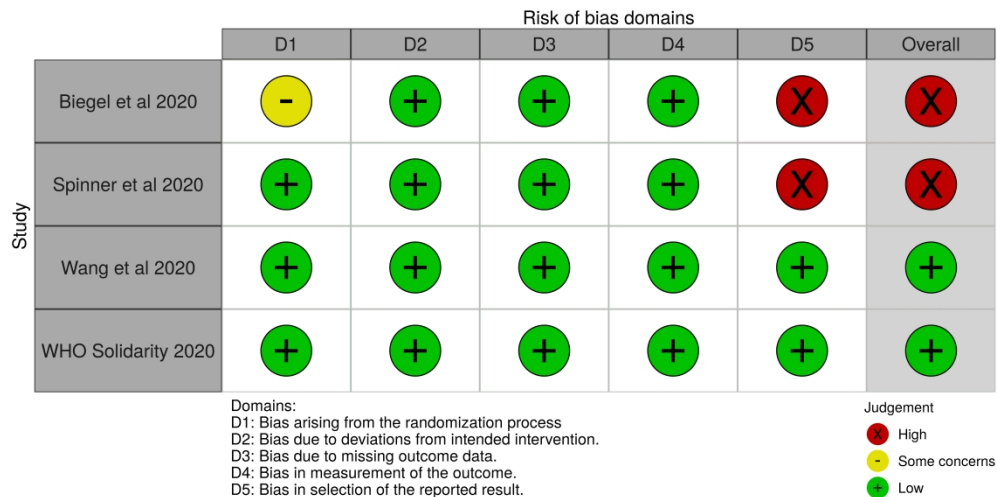

Figure 2: ROB-2: Risk of bias in RCT evaluating Remdesivir for treatment of COVID-19

227x127mm (800 x 800 DPI)

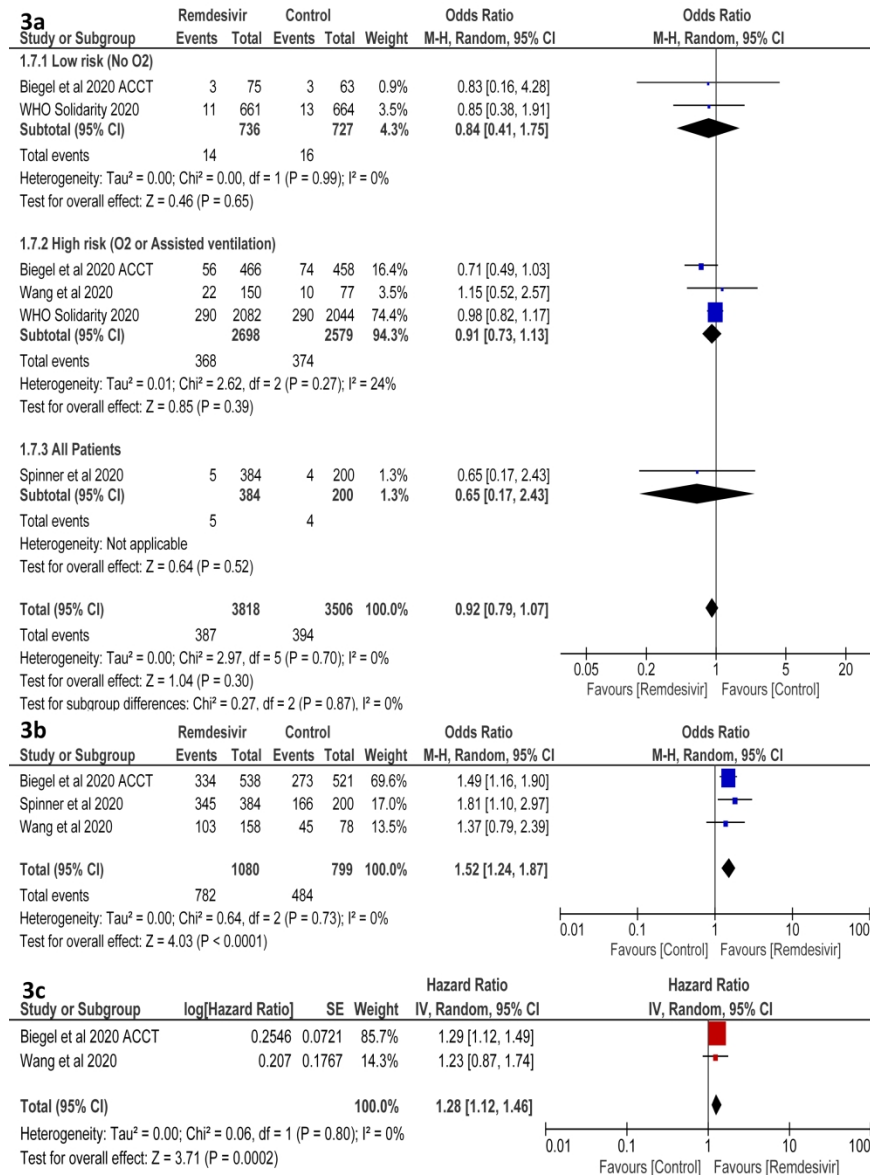

Figure 3: Mortality rate (3a), clinical improvement (3b) and time to clinical improvement (3c) of remdesivir vs control treatment

158x218mm (400 x 400 DPI)



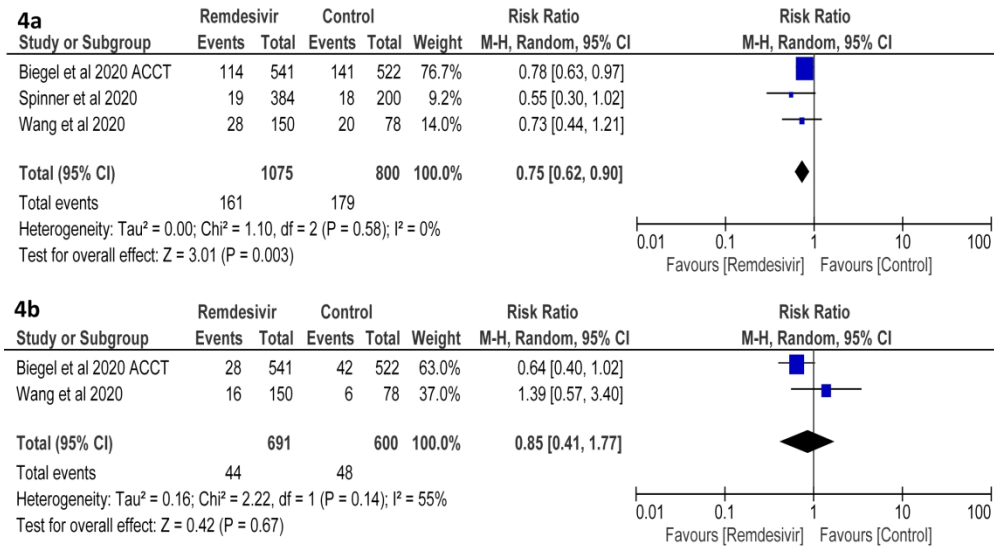

Figure 4: Number of patients with Serious adverse events (4a) and respiratory failure (4b) (remdesivir vs control treatment)

158x89mm (400 x 400 DPI)

## Search Strategy for PubMed

| Search number | Query                                         | Filters                                     | Search Details                                                                                                                                                                                                                                                                                                                                                                                                                                                                                                                                                                                                                                                                                                                                                                                                                                                                                                                                                                                                        |
|---------------|-----------------------------------------------|---------------------------------------------|-----------------------------------------------------------------------------------------------------------------------------------------------------------------------------------------------------------------------------------------------------------------------------------------------------------------------------------------------------------------------------------------------------------------------------------------------------------------------------------------------------------------------------------------------------------------------------------------------------------------------------------------------------------------------------------------------------------------------------------------------------------------------------------------------------------------------------------------------------------------------------------------------------------------------------------------------------------------------------------------------------------------------|
| 6             | ((SARS-CoV-2) OR (COVID-19)) AND (Remdesivir) | Clinical Trial, Randomized Controlled Trial | (("sars cov 2"[MeSH Terms] OR "sars cov 2"[All Fields] OR "sars cov 2"[All Fields] OR ("covid 19"[All Fields] OR "covid 19"[MeSH Terms] OR "covid 19 vaccines"[All Fields] OR "covid 19 vaccines"[MeSH Terms] OR "covid 19 serotherapy"[All Fields] OR "covid 19 serotherapy"[Supplementary Concept] OR "covid 19 nucleic acid testing"[All Fields] OR "covid 19 nucleic acid testing"[MeSH Terms] OR "covid 19 serological testing"[All Fields] OR "covid 19 serological testing"[MeSH Terms] OR "covid 19 testing"[All Fields] OR "covid 19 testing"[MeSH Terms] OR "sars cov 2"[All Fields] OR "sars cov 2"[MeSH Terms] OR "severe acute respiratory syndrome coronavirus 2"[All Fields] OR "ncov"[All Fields] OR "2019 ncov"[All Fields] OR ("coronavirus"[MeSH Terms] OR "coronavirus"[All Fields] OR "cov"[All Fields]) AND 2019/11/01:3000/12/31[Date - Publication])) AND ("remdesivir"[Supplementary Concept] OR "remdesivir"[All Fields])) AND (clinicaltrial[Filter] OR randomizedcontrolledtrial[Filter]) |
| 5             | ((SARS-CoV-2) OR (COVID-19)) AND (Remdesivir) | Clinical Trial                              | (("sars cov 2"[MeSH Terms] OR "sars cov 2"[All Fields] OR "sars cov 2"[All Fields] OR ("covid 19"[All Fields] OR "covid 19"[MeSH Terms] OR "covid 19 vaccines"[All Fields] OR "covid 19 vaccines"[MeSH Terms] OR "covid 19 serotherapy"[All Fields] OR "covid 19 serotherapy"[Supplementary Concept] OR "covid 19 nucleic acid testing"[All Fields] OR "covid 19 nucleic acid testing"[MeSH Terms] OR "covid 19 serological testing"[All Fields] OR "covid 19 serological testing"[MeSH Terms] OR "covid 19 testing"[All Fields] OR "covid 19 testing"[MeSH Terms] OR "sars cov 2"[All Fields] OR "sars cov 2"[MeSH Terms] OR "severe acute respiratory syndrome coronavirus 2"[All Fields] OR "ncov"[All Fields] OR "2019 ncov"[All Fields] OR ("coronavirus"[MeSH Terms] OR "coronavirus"[All Fields] OR "cov"[All Fields]) AND 2019/11/01:3000/12/31[Date - Publication])) AND ("remdesivir"[Supplementary Concept] OR "remdesivir"[All Fields])) AND (clinicaltrial[Filter])                                      |

|   |                                               |                                                                                                                                                                                                                                                                                                                                                                                                                                                                                                                                                                                                                                                                                                                                                                                                                                                                                                                                                    |
|---|-----------------------------------------------|----------------------------------------------------------------------------------------------------------------------------------------------------------------------------------------------------------------------------------------------------------------------------------------------------------------------------------------------------------------------------------------------------------------------------------------------------------------------------------------------------------------------------------------------------------------------------------------------------------------------------------------------------------------------------------------------------------------------------------------------------------------------------------------------------------------------------------------------------------------------------------------------------------------------------------------------------|
| 4 | ((SARS-CoV-2) OR (COVID-19)) AND (Remdesivir) | ("sars cov 2"[MeSH Terms] OR "sars cov 2"[All Fields] OR "sars cov 2"[All Fields] OR ("covid 19"[All Fields] OR "covid 19"[MeSH Terms] OR "covid 19 vaccines"[All Fields] OR "covid 19 vaccines"[MeSH Terms] OR "covid 19 serotherapy"[All Fields] OR "covid 19 serotherapy"[Supplementary Concept] OR "covid 19 nucleic acid testing"[All Fields] OR "covid 19 nucleic acid testing"[MeSH Terms] OR "covid 19 serological testing"[All Fields] OR "covid 19 serological testing"[MeSH Terms] OR "covid 19 testing"[All Fields] OR "covid 19 testing"[MeSH Terms] OR "sars cov 2"[All Fields] OR "sars cov 2"[MeSH Terms] OR "severe acute respiratory syndrome coronavirus 2"[All Fields] OR "ncov"[All Fields] OR "2019 ncov"[All Fields] OR ("coronavirus"[MeSH Terms] OR "coronavirus"[All Fields] OR "cov"[All Fields]) AND 2019/11/01:3000/12/31[Date - Publication])) AND ("remdesivir"[Supplementary Concept] OR "remdesivir"[All Fields]) |
| 3 | SARS-CoV-2                                    | "sars cov 2"[MeSH Terms] OR "sars cov 2"[All Fields] OR "sars cov 2"[All Fields]                                                                                                                                                                                                                                                                                                                                                                                                                                                                                                                                                                                                                                                                                                                                                                                                                                                                   |
| 2 | COVID-19                                      | "covid 19"[All Fields] OR "covid 19"[MeSH Terms] OR "covid 19 vaccines"[All Fields] OR "covid 19 vaccines"[MeSH Terms] OR "covid 19 serotherapy"[All Fields] OR "covid 19 serotherapy"[Supplementary Concept] OR "covid 19 nucleic acid testing"[All Fields] OR "covid 19 nucleic acid testing"[MeSH Terms] OR "covid 19 serological testing"[All Fields] OR "covid 19 serological testing"[MeSH Terms] OR "covid 19 testing"[All Fields] OR "covid 19 testing"[MeSH Terms] OR "sars cov 2"[All Fields] OR "sars cov 2"[MeSH Terms] OR "severe acute respiratory syndrome coronavirus 2"[All Fields] OR "ncov"[All Fields] OR "2019 ncov"[All Fields] OR ("coronavirus"[MeSH Terms] OR "coronavirus"[All Fields] OR "cov"[All Fields]) AND 2019/11/01:3000/12/31[Date - Publication])                                                                                                                                                              |
| 1 | Remdesivir                                    | "remdesivir"[Supplementary Concept] OR "remdesivir"[All Fields]                                                                                                                                                                                                                                                                                                                                                                                                                                                                                                                                                                                                                                                                                                                                                                                                                                                                                    |

### References of Excluded Articles

1. Ader F. Protocol for the DisCoVeRy trial: multicentre, adaptive, randomised trial of the safety and efficacy of treatments for COVID-19 in hospitalised adults. *BMJ open*. 2020 Sep 21;10(9):e041437.
2. Antinori S, Cossu MV, Ridolfo AL, Rech R, Bonazzetti C, Pagani G, et al. Compassionate remdesivir treatment of severe Covid-19 pneumonia in intensive care unit (ICU) and Non-ICU

1  
2  
3 patients: Clinical outcome and differences in post-treatment hospitalisation status. *Pharmacological*  
4 *research*. 2020 Aug;158:104899.

5 3. Goldman JD, Lye DCB, Hui DS, Marks KM, Bruno R, Montejano R, et al. Remdesivir for 5 or 10  
6 Days in Patients with Severe Covid-19. *The New England journal of medicine*. 2020 Nov  
7 5;383(19):1827-37.

8 4. Soto A, Quiñones-Laveriano DM, Garcia PJ, Gotuzzo E, Henao-Restrepo AM. [Not Available].  
9 *Revista peruana de medicina experimental y salud publica*. 2020 Apr-Jun;37(2):356-60.

10 5. kjm6y RBR. A phase 2 randomized double-blind placebo-controlled study to evaluate safety  
11 of BLD-2660 and its activity against COVID-19 virus in hospitalized subjects recently diagnosed with  
12 COVID-19 in comparison to standard of care treatment.

13 <http://www.who.int/trialssearch/Trial2.aspx?TrialID=RBR-2kjm6y>. 2020.

14 6. Mulangu S. The palm consortium: a multicenter, multioutbreak randomized controlled trial  
15 of ebola virus disease therapeutics. *Open forum infectious diseases*. [Journal: Conference Abstract].  
16 2019;6:S12-S3.

17 7. Mulangu S, Dodd LE, Davey RT, Tshiani Mbaya O, Proschan M, Mukadi D, et al. A  
18 Randomized, Controlled Trial of Ebola Virus Disease Therapeutics. *New England journal of medicine*.  
19 [Comparative Study; Journal Article; Multicenter Study; Randomized Controlled Trial; Research  
20 Support, N.I.H., Extramural; Research Support, Non-U.S. Gov't; Research Support, U.S. Gov't, Non-  
21 P.H.S.; Research Support, U.S. Gov't, P.H.S.]. 2019;381(24):2293-303.

22 8. Nct. Efficacy and Safety of IFN- $\alpha$ 2 $\beta$  in the Treatment of Novel Coronavirus Patients.

23 <https://clinicaltrials.gov/show/NCT04293887>. 2020.

24 9. Nct. Expanded Access Remdesivir (RDV; GS-5734™).

25 <https://clinicaltrials.gov/show/NCT04302766>. 2020.

26 10. Nct. Cyclosporine For The Treatment Of Covid-19(+).

27 <https://clinicaltrials.gov/show/NCT04492891>. 2020.

28 11. Nct. Adaptive COVID-19 Treatment Trial 3 (ACTT-3).

29 <https://clinicaltrials.gov/show/NCT04492475>. 2020.

30 12. Nct. I-SPY COVID-19 TRIAL: an Adaptive Platform Trial for Critically Ill Patients.

31 <https://clinicaltrials.gov/show/NCT04488081>. 2020.

32 13. Nct. Norwegian Coronavirus Disease 2019 Study.

33 <https://clinicaltrials.gov/show/NCT04316377>. 2020.

34 14. Nct. Clinical Trial of the Use of Anakinra in Cytokine Storm Syndrome Secondary to Covid-19  
35 (ANA-COVID-GEAS). <https://clinicaltrials.gov/show/NCT04443881>. 2020.

36 15. Nct. Convalescent Plasma as a Possible Treatment for COVID-19.

37 <https://clinicaltrials.gov/show/NCT04442191>. 2020.

38 16. Nct. Military COVID-19 Hydroxychloroquine Pre-exposure and Post-exposure Prophylaxis  
39 Study. <https://clinicaltrials.gov/show/NCT04343677>. 2020.

40 17. Nct. Favipiravir vs Hydroxychloroquine in COVID -19.

41 <https://clinicaltrials.gov/show/NCT04387760>. 2020.

42 18. Nct. Hydroxychloroquine in SARS-CoV-2 (COVID-19) Pneumonia Trial.

43 <https://clinicaltrials.gov/show/NCT04382625>. 2020.

44 19. Nct. Drug-drug Interactions Between Remdesivir and Commonly Used Antiretroviral  
45 Therapy. <https://clinicaltrials.gov/show/NCT04385719>. 2020.

46 20. Nct. Hydroxychloroquine and Ivermectin for the Treatment of COVID-19 Infection.

47 <https://clinicaltrials.gov/show/NCT04391127>. 2020.

48 21. Nct. Hormonal Intervention for the Treatment in Veterans With COVID-19 Requiring  
49 Hospitalization. <https://clinicaltrials.gov/show/NCT04397718>. 2020.

50 22. Nct. Adaptive COVID-19 Treatment Trial 2 (ACTT-II).

51 <https://clinicaltrials.gov/show/NCT04401579>. 2020.

- 1  
2  
3 23. Nct. A Randomized, Double-Blind, Placebo-Controlled Study to Evaluate the Safety and  
4 Efficacy of EB05 + SOC vs. Placebo + SOC in Adult Hospitalized Patients With Moderate to Severe  
5 COVID-19 Pneumonia. <https://clinicaltrials.gov/show/NCT04401475>. 2020.
- 6  
7 24. Nct. Study of Merimepodib in Combination With Remdesivir in Adult Patients With  
8 Advanced COVID-19. <https://clinicaltrials.gov/show/NCT04410354>. 2020.
- 9  
10 25. Nct. The ECLA PHRI COLCOVID Trial. <https://clinicaltrials.gov/show/NCT04328480>. 2020.
- 11  
12 26. Nct. A Study to Evaluate the Efficacy and Safety of Remdesivir Plus Tocilizumab Compared  
13 With Remdesivir Plus Placebo in Hospitalized Participants With Severe COVID-19 Pneumonia.  
14 <https://clinicaltrials.gov/show/NCT04409262>. 2020.
- 15  
16 27. Nct. RAPA-501-Allo Off-the-Shelf Therapy of COVID-19.  
17 <https://clinicaltrials.gov/show/NCT04482699>. 2020.
- 18  
19 28. Nct. Rapid Experimental Medicine for COVID-19.  
20 <https://clinicaltrials.gov/show/NCT04473053>. 2020.
- 21  
22 29. Nct. Nitric Oxide Therapy for COVID-19 Patients With Oxygen Requirement.  
23 <https://clinicaltrials.gov/show/NCT04476992>. 2020.
- 24  
25 30. Nct. Safety, Tolerability and Pharmacokinetics of Inhaled Nanoparticle Formulation of  
26 Remdesivir (GS-5734) and NA-831. <https://clinicaltrials.gov/show/NCT04480333>. 2020.
- 27  
28 31. Nct. Nelfinavir and Favipiravir Combination in Newly Diagnosed COVID19 Egyptian Patients.  
29 <https://clinicaltrials.gov/show/NCT04471662>. 2020.
- 30  
31 32. Nct. Mild/Moderate 2019-nCoV Remdesivir RCT.  
32 <https://clinicaltrials.gov/show/NCT04252664>. 2020.
- 33  
34 33. Nct. Sarilumab for Patients With Moderate COVID-19 Disease.  
35 <https://clinicaltrials.gov/show/NCT04359901>. 2020.
- 36  
37 34. Nct. COLchicine in Moderate-severe Hospitalized Patients Before ARDS to Treat COVID-19.  
38 <https://clinicaltrials.gov/show/NCT04363437>. 2020.
- 39  
40 35. Nct. The Efficacy of Different Anti-viral Drugs in (Severe Acute Respiratory Syndrome-Corona  
41 Virus-2) SARS-CoV-2. <https://clinicaltrials.gov/show/NCT04321616>. 2020.
- 42  
43 36. Olender SA, Perez KK, Go AS, Balani B, Price-Haywood EG, Shah NS, et al. Remdesivir for  
44 Severe COVID-19 versus a Cohort Receiving Standard of Care. *Clinical infectious diseases*. [Journal:  
45 Article in Press]. 2020.
- 46  
47 37. Wiersinga WJ, Rhodes A, Cheng AC, Peacock SJ, Prescott HC. Pathophysiology, Transmission,  
48 Diagnosis, and Treatment of Coronavirus Disease 2019 (COVID-19): a Review. *JAMA - journal of the  
49 american medical association*. [Journal: Article in Press]. 2020.
- 50  
51 38. Grein J, Ohmagari N, Shin D, Diaz G, Asperges E, Castagna A, et al. Compassionate Use of  
52 Remdesivir for Patients with Severe Covid-19. *The New England journal of medicine*. 2020 Jun  
53 11;382(24):2327-36.
- 54  
55  
56  
57  
58  
59  
60

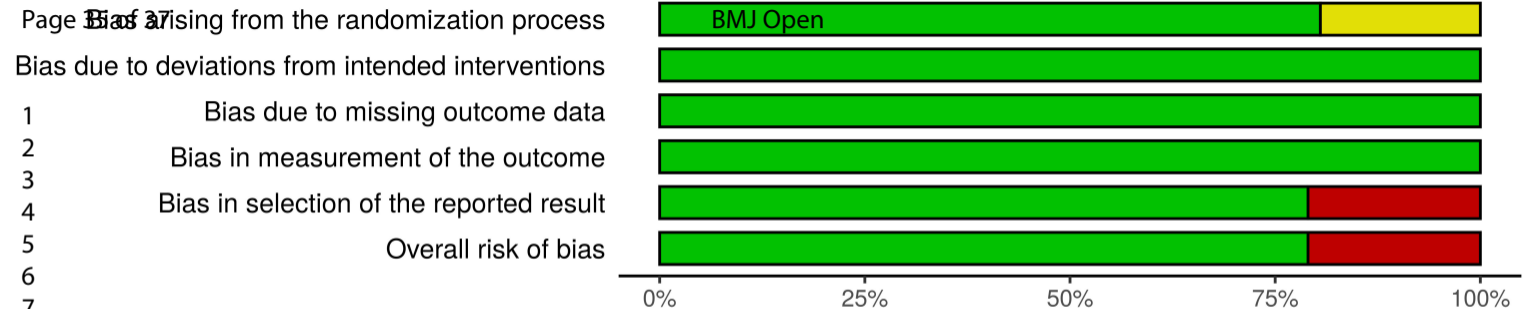

For peer review only - <http://bmjopen.bmj.com/site/about/guidelines.xhtml>

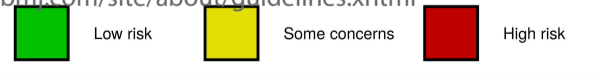



\*Invasive ventilation subgroup, Wang et al study included patients on high flow oxygen in addition to invasive ventilation



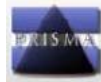

# PRISMA 2009 Checklist

1  
2  
3  
4  
5  
6  
7  
8  
9  
10  
11  
12  
13  
14  
15  
16  
17  
18  
19  
20  
21  
22  
23  
24  
25  
26  
27  
28  
29  
30  
31  
32  
33  
34  
35  
36  
37  
38  
39  
40  
41  
42  
43  
44  
45  
46  
47

| Section/topic                      | #  | Checklist item                                                                                                                                                                                                                                                                                              | Reported on page # |
|------------------------------------|----|-------------------------------------------------------------------------------------------------------------------------------------------------------------------------------------------------------------------------------------------------------------------------------------------------------------|--------------------|
| <b>TITLE</b>                       |    |                                                                                                                                                                                                                                                                                                             |                    |
| Title                              | 1  | Identify the report as a systematic review, meta-analysis, or both.                                                                                                                                                                                                                                         | 1, 3               |
| <b>ABSTRACT</b>                    |    |                                                                                                                                                                                                                                                                                                             |                    |
| Structured summary                 | 2  | Provide a structured summary including, as applicable: background; objectives; data sources; study eligibility criteria, participants, and interventions; study appraisal and synthesis methods; results; limitations; conclusions and implications of key findings; systematic review registration number. | 3-4                |
| <b>INTRODUCTION</b>                |    |                                                                                                                                                                                                                                                                                                             |                    |
| Rationale                          | 3  | Describe the rationale for the review in the context of what is already known.                                                                                                                                                                                                                              | 5                  |
| Objectives                         | 4  | Provide an explicit statement of questions being addressed with reference to participants, interventions, comparisons, outcomes, and study design (PICOS).                                                                                                                                                  | 5                  |
| <b>METHODS</b>                     |    |                                                                                                                                                                                                                                                                                                             |                    |
| Protocol and registration          | 5  | Indicate if a review protocol exists, if and where it can be accessed (e.g., Web address), and, if available, provide registration information including registration number.                                                                                                                               | 6                  |
| Eligibility criteria               | 6  | Specify study characteristics (e.g., PICOS, length of follow-up) and report characteristics (e.g., years considered, language, publication status) used as criteria for eligibility, giving rationale.                                                                                                      | 6                  |
| Information sources                | 7  | Describe all information sources (e.g., databases with dates of coverage, contact with study authors to identify additional studies) in the search and date last searched.                                                                                                                                  | 6                  |
| Search                             | 8  | Present full electronic search strategy for at least one database, including any limits used, such that it could be repeated.                                                                                                                                                                               | 6                  |
| Study selection                    | 9  | State the process for selecting studies (i.e., screening, eligibility, included in systematic review, and, if applicable, included in the meta-analysis).                                                                                                                                                   | 6                  |
| Data collection process            | 10 | Describe method of data extraction from reports (e.g., piloted forms, independently, in duplicate) and any processes for obtaining and confirming data from investigators.                                                                                                                                  | 6                  |
| Data items                         | 11 | List and define all variables for which data were sought (e.g., PICOS, funding sources) and any assumptions and simplifications made.                                                                                                                                                                       | 6                  |
| Risk of bias in individual studies | 12 | Describe methods used for assessing risk of bias of individual studies (including specification of whether this was done at the study or outcome level), and how this information is to be used in any data synthesis.                                                                                      | 7                  |
| Summary measures                   | 13 | State the principal summary measures (e.g., risk ratio, difference in means).                                                                                                                                                                                                                               | 7                  |
| Synthesis of results               | 14 | Describe the methods of handling data and combining results of studies, if done, including measures of consistency (e.g., I <sup>2</sup> ) for each meta-analysis.                                                                                                                                          | 7                  |





# PRISMA 2009 Checklist

Page 1 of 2

| Section/topic                 | #  | Checklist item                                                                                                                                                                                           | Reported on page # |
|-------------------------------|----|----------------------------------------------------------------------------------------------------------------------------------------------------------------------------------------------------------|--------------------|
| Risk of bias across studies   | 15 | Specify any assessment of risk of bias that may affect the cumulative evidence (e.g., publication bias, selective reporting within studies).                                                             | 7                  |
| Additional analyses           | 16 | Describe methods of additional analyses (e.g., sensitivity or subgroup analyses, meta-regression), if done, indicating which were pre-specified.                                                         | 7                  |
| <b>RESULTS</b>                |    |                                                                                                                                                                                                          |                    |
| Study selection               | 17 | Give numbers of studies screened, assessed for eligibility, and included in the review, with reasons for exclusions at each stage, ideally with a flow diagram.                                          | 8                  |
| Study characteristics         | 18 | For each study, present characteristics for which data were extracted (e.g., study size, PICOS, follow-up period) and provide the citations.                                                             | 8                  |
| Risk of bias within studies   | 19 | Present data on risk of bias of each study and, if available, any outcome level assessment (see item 12).                                                                                                | 8                  |
| Results of individual studies | 20 | For all outcomes considered (benefits or harms), present, for each study: (a) simple summary data for each intervention group (b) effect estimates and confidence intervals, ideally with a forest plot. | 8                  |
| Synthesis of results          | 21 | Present results of each meta-analysis done, including confidence intervals and measures of consistency.                                                                                                  | 8                  |
| Risk of bias across studies   | 22 | Present results of any assessment of risk of bias across studies (see Item 15).                                                                                                                          | 8                  |
| Additional analysis           | 23 | Give results of additional analyses, if done (e.g., sensitivity or subgroup analyses, meta-regression [see Item 16]).                                                                                    | 8-9                |
| <b>DISCUSSION</b>             |    |                                                                                                                                                                                                          |                    |
| Summary of evidence           | 24 | Summarize the main findings including the strength of evidence for each main outcome; consider their relevance to key groups (e.g., healthcare providers, users, and policy makers).                     | 12                 |
| Limitations                   | 25 | Discuss limitations at study and outcome level (e.g., risk of bias), and at review-level (e.g., incomplete retrieval of identified research, reporting bias).                                            | 12, 4              |
| Conclusions                   | 26 | Provide a general interpretation of the results in the context of other evidence, and implications for future research.                                                                                  | 13                 |
| <b>FUNDING</b>                |    |                                                                                                                                                                                                          |                    |
| Funding                       | 27 | Describe sources of funding for the systematic review and other support (e.g., supply of data); role of funders for the systematic review.                                                               | None               |

From: Moher D, Liberati A, Tetzlaff J, Altman DG, The PRISMA Group (2009). Preferred Reporting Items for Systematic Reviews and Meta-Analyses: The PRISMA Statement. PLoS Med 6(6): e1000097. doi:10.1371/journal.pmed1000097

For more information, visit: [www.prisma-statement.org](http://www.prisma-statement.org).

Page 2 of 2  
For peer review only - <http://bmjopen.bmj.com/site/about/guidelines.xhtml>
