# Supplementary material for: Efficacy and safety of remdesivir in COVID-19 caused by SARS-CoV-2: a systematic review and meta-analysis
Source: PubMed Central journal article supplement — BMJ Open. 2021 Jun 24;11(6):e048416. doi: 10.1136/bmjopen-2020-048416 (PMC8228818; doi:10.1136/bmjopen-2020-048416), 2021-06-24
Supplement: bmjopen-2020-048416supp003.pdf [file bmjopen-2020-048416supp003.pdf]

## Search Strategy for PubMed

| Search number | Query                                         | Filters                                     | Search Details                                                                                                                                                                                                                                                                                                                                                                                                                                                                                                                                                                                                                                                                                                                                                                                                                                                                                                                                                                                                           |
|---------------|-----------------------------------------------|---------------------------------------------|--------------------------------------------------------------------------------------------------------------------------------------------------------------------------------------------------------------------------------------------------------------------------------------------------------------------------------------------------------------------------------------------------------------------------------------------------------------------------------------------------------------------------------------------------------------------------------------------------------------------------------------------------------------------------------------------------------------------------------------------------------------------------------------------------------------------------------------------------------------------------------------------------------------------------------------------------------------------------------------------------------------------------|
| 6             | ((SARS-CoV-2) OR (COVID-19)) AND (Remdesivir) | Clinical Trial, Randomized Controlled Trial | ((("sars cov 2"[MeSH Terms] OR "sars cov 2"[All Fields] OR "sars cov 2"[All Fields] OR ("covid 19"[All Fields] OR "covid 19"[MeSH Terms] OR "covid 19 vaccines"[All Fields] OR "covid 19 vaccines"[MeSH Terms] OR "covid 19 serotherapy"[All Fields] OR "covid 19 serotherapy"[Supplementary Concept] OR "covid 19 nucleic acid testing"[All Fields] OR "covid 19 nucleic acid testing"[MeSH Terms] OR "covid 19 serological testing"[All Fields] OR "covid 19 serological testing"[MeSH Terms] OR "covid 19 testing"[All Fields] OR "covid 19 testing"[MeSH Terms] OR "sars cov 2"[All Fields] OR "sars cov 2"[MeSH Terms] OR "severe acute respiratory syndrome coronavirus 2"[All Fields] OR "ncov"[All Fields] OR "2019 ncov"[All Fields] OR (("coronavirus"[MeSH Terms] OR "coronavirus"[All Fields] OR "cov"[All Fields]) AND 2019/11/01:3000/12/31[Date - Publication]))) AND ("remdesivir"[Supplementary Concept] OR "remdesivir"[All Fields])) AND (clinicaltrial[Filter] OR randomizedcontrolledtrial[Filter]) |
| 5             | ((SARS-CoV-2) OR (COVID-19)) AND (Remdesivir) | Clinical Trial                              | ((("sars cov 2"[MeSH Terms] OR "sars cov 2"[All Fields] OR "sars cov 2"[All Fields] OR ("covid 19"[All Fields] OR "covid 19"[MeSH Terms] OR "covid 19 vaccines"[All Fields] OR "covid 19 vaccines"[MeSH Terms] OR "covid 19 serotherapy"[All Fields] OR "covid 19 serotherapy"[Supplementary Concept] OR "covid 19 nucleic acid testing"[All Fields] OR "covid 19 nucleic acid testing"[MeSH Terms] OR "covid 19 serological testing"[All Fields] OR "covid 19 serological testing"[MeSH Terms] OR "covid 19 testing"[All Fields] OR "covid 19 testing"[MeSH Terms] OR "sars cov 2"[All Fields] OR "sars cov 2"[MeSH Terms] OR "severe acute respiratory syndrome coronavirus 2"[All Fields] OR "ncov"[All Fields] OR "2019 ncov"[All Fields] OR (("coronavirus"[MeSH Terms] OR "coronavirus"[All Fields] OR "cov"[All Fields]) AND 2019/11/01:3000/12/31[Date - Publication]))) AND ("remdesivir"[Supplementary Concept] OR "remdesivir"[All Fields])) AND (clinicaltrial[Filter])                                      |

|   |                                               |                                                                                                                                                                                                                                                                                                                                                                                                                                                                                                                                                                                                                                                                                                                                                                                                                                                                                                                                                    |
|---|-----------------------------------------------|----------------------------------------------------------------------------------------------------------------------------------------------------------------------------------------------------------------------------------------------------------------------------------------------------------------------------------------------------------------------------------------------------------------------------------------------------------------------------------------------------------------------------------------------------------------------------------------------------------------------------------------------------------------------------------------------------------------------------------------------------------------------------------------------------------------------------------------------------------------------------------------------------------------------------------------------------|
| 4 | ((SARS-CoV-2) OR (COVID-19)) AND (Remdesivir) | ("sars cov 2"[MeSH Terms] OR "sars cov 2"[All Fields] OR "sars cov 2"[All Fields] OR ("covid 19"[All Fields] OR "covid 19"[MeSH Terms] OR "covid 19 vaccines"[All Fields] OR "covid 19 vaccines"[MeSH Terms] OR "covid 19 serotherapy"[All Fields] OR "covid 19 serotherapy"[Supplementary Concept] OR "covid 19 nucleic acid testing"[All Fields] OR "covid 19 nucleic acid testing"[MeSH Terms] OR "covid 19 serological testing"[All Fields] OR "covid 19 serological testing"[MeSH Terms] OR "covid 19 testing"[All Fields] OR "covid 19 testing"[MeSH Terms] OR "sars cov 2"[All Fields] OR "sars cov 2"[MeSH Terms] OR "severe acute respiratory syndrome coronavirus 2"[All Fields] OR "ncov"[All Fields] OR "2019 ncov"[All Fields] OR ("coronavirus"[MeSH Terms] OR "coronavirus"[All Fields] OR "cov"[All Fields]) AND 2019/11/01:3000/12/31[Date - Publication])) AND ("remdesivir"[Supplementary Concept] OR "remdesivir"[All Fields]) |
| 3 | SARS-CoV-2                                    | "sars cov 2"[MeSH Terms] OR "sars cov 2"[All Fields] OR "sars cov 2"[All Fields]                                                                                                                                                                                                                                                                                                                                                                                                                                                                                                                                                                                                                                                                                                                                                                                                                                                                   |
| 2 | COVID-19                                      | "covid 19"[All Fields] OR "covid 19"[MeSH Terms] OR "covid 19 vaccines"[All Fields] OR "covid 19 vaccines"[MeSH Terms] OR "covid 19 serotherapy"[All Fields] OR "covid 19 serotherapy"[Supplementary Concept] OR "covid 19 nucleic acid testing"[All Fields] OR "covid 19 nucleic acid testing"[MeSH Terms] OR "covid 19 serological testing"[All Fields] OR "covid 19 serological testing"[MeSH Terms] OR "covid 19 testing"[All Fields] OR "covid 19 testing"[MeSH Terms] OR "sars cov 2"[All Fields] OR "sars cov 2"[MeSH Terms] OR "severe acute respiratory syndrome coronavirus 2"[All Fields] OR "ncov"[All Fields] OR "2019 ncov"[All Fields] OR ("coronavirus"[MeSH Terms] OR "coronavirus"[All Fields] OR "cov"[All Fields]) AND 2019/11/01:3000/12/31[Date - Publication]                                                                                                                                                               |
| 1 | Remdesivir                                    | "remdesivir"[Supplementary Concept] OR "remdesivir"[All Fields]                                                                                                                                                                                                                                                                                                                                                                                                                                                                                                                                                                                                                                                                                                                                                                                                                                                                                    |

### References of Excluded Articles

1. Ader F. Protocol for the DisCoVeRy trial: multicentre, adaptive, randomised trial of the safety and efficacy of treatments for COVID-19 in hospitalised adults. *BMJ open*. 2020 Sep 21;10(9):e041437.
2. Antinori S, Cossu MV, Ridolfo AL, Rech R, Bonazzetti C, Pagani G, et al. Compassionate remdesivir treatment of severe Covid-19 pneumonia in intensive care unit (ICU) and Non-ICU

patients: Clinical outcome and differences in post-treatment hospitalisation status. *Pharmacological research*. 2020 Aug;158:104899.

3. Goldman JD, Lye DCB, Hui DS, Marks KM, Bruno R, Montejano R, et al. Remdesivir for 5 or 10 Days in Patients with Severe Covid-19. *The New England journal of medicine*. 2020 Nov 5;383(19):1827-37.
4. Soto A, Quiñones-Laveriano DM, Garcia PJ, Gotuzzo E, Henao-Restrepo AM. [Not Available]. *Revista peruana de medicina experimental y salud publica*. 2020 Apr-Jun;37(2):356-60.
5. kjm6y RBR. A phase 2 randomized double-blind placebo-controlled study to evaluate safety of BLD-2660 and its activity against COVID-19 virus in hospitalized subjects recently diagnosed with COVID-19 in comparison to standard of care treatment. <http://www.who.int/trialssearch/Trial2.aspx?TrialID=RBR-2kjm6y>. 2020.
6. Mulangu S. The palm consortium: a multicenter, multioutbreak randomized controlled trial of ebola virus disease therapeutics. *Open forum infectious diseases*. [Journal: Conference Abstract]. 2019;6:S12-S3.
7. Mulangu S, Dodd LE, Davey RT, Tshiani Mbaya O, Proschan M, Mukadi D, et al. A Randomized, Controlled Trial of Ebola Virus Disease Therapeutics. *New England journal of medicine*. [Comparative Study; Journal Article; Multicenter Study; Randomized Controlled Trial; Research Support, N.I.H., Extramural; Research Support, Non-U.S. Gov't; Research Support, U.S. Gov't, Non-P.H.S.; Research Support, U.S. Gov't, P.H.S.]. 2019;381(24):2293-303.
8. Nct. Efficacy and Safety of IFN- $\alpha$ 2 $\beta$  in the Treatment of Novel Coronavirus Patients. <https://clinicaltrials.gov/show/NCT04293887>. 2020.
9. Nct. Expanded Access Remdesivir (RDV; GS-5734™). <https://clinicaltrials.gov/show/NCT04302766>. 2020.
10. Nct. Cyclosporine For The Treatment Of Covid-19(+). <https://clinicaltrials.gov/show/NCT04492891>. 2020.
11. Nct. Adaptive COVID-19 Treatment Trial 3 (ACTT-3). <https://clinicaltrials.gov/show/NCT04492475>. 2020.
12. Nct. I-SPY COVID-19 TRIAL: an Adaptive Platform Trial for Critically Ill Patients. <https://clinicaltrials.gov/show/NCT04488081>. 2020.
13. Nct. Norwegian Coronavirus Disease 2019 Study. <https://clinicaltrials.gov/show/NCT04316377>. 2020.
14. Nct. Clinical Trial of the Use of Anakinra in Cytokine Storm Syndrome Secondary to Covid-19 (ANA-COVID-GEAS). <https://clinicaltrials.gov/show/NCT04443881>. 2020.
15. Nct. Convalescent Plasma as a Possible Treatment for COVID-19. <https://clinicaltrials.gov/show/NCT04442191>. 2020.
16. Nct. Military COVID-19 Hydroxychloroquine Pre-exposure and Post-exposure Prophylaxis Study. <https://clinicaltrials.gov/show/NCT04343677>. 2020.
17. Nct. Favipiravir vs Hydroxychloroquine in COVID -19. <https://clinicaltrials.gov/show/NCT04387760>. 2020.
18. Nct. Hydroxychloroquine in SARS-CoV-2 (COVID-19) Pneumonia Trial. <https://clinicaltrials.gov/show/NCT04382625>. 2020.
19. Nct. Drug-drug Interactions Between Remdesivir and Commonly Used Antiretroviral Therapy. <https://clinicaltrials.gov/show/NCT04385719>. 2020.
20. Nct. Hydroxychloroquine and Ivermectin for the Treatment of COVID-19 Infection. <https://clinicaltrials.gov/show/NCT04391127>. 2020.
21. Nct. Hormonal Intervention for the Treatment in Veterans With COVID-19 Requiring Hospitalization. <https://clinicaltrials.gov/show/NCT04397718>. 2020.
22. Nct. Adaptive COVID-19 Treatment Trial 2 (ACTT-II). <https://clinicaltrials.gov/show/NCT04401579>. 2020.

23. Nct. A Randomized, Double-Blind, Placebo-Controlled Study to Evaluate the Safety and Efficacy of EB05 + SOC vs. Placebo + SOC in Adult Hospitalized Patients With Moderate to Severe COVID-19 Pneumonia. <https://clinicaltrials.gov/show/NCT04401475>. 2020.
24. Nct. Study of Merimepodib in Combination With Remdesivir in Adult Patients With Advanced COVID-19. <https://clinicaltrials.gov/show/NCT04410354>. 2020.
25. Nct. The ECLA PHRI COLCOVID Trial. <https://clinicaltrials.gov/show/NCT04328480>. 2020.
26. Nct. A Study to Evaluate the Efficacy and Safety of Remdesivir Plus Tocilizumab Compared With Remdesivir Plus Placebo in Hospitalized Participants With Severe COVID-19 Pneumonia. <https://clinicaltrials.gov/show/NCT04409262>. 2020.
27. Nct. RAPA-501-Allo Off-the-Shelf Therapy of COVID-19. <https://clinicaltrials.gov/show/NCT04482699>. 2020.
28. Nct. Rapid Experimental Medicine for COVID-19. <https://clinicaltrials.gov/show/NCT04473053>. 2020.
29. Nct. Nitric Oxide Therapy for COVID-19 Patients With Oxygen Requirement. <https://clinicaltrials.gov/show/NCT04476992>. 2020.
30. Nct. Safety, Tolerability and Pharmacokinetics of Inhaled Nanoparticle Formulation of Remdesivir (GS-5734) and NA-831. <https://clinicaltrials.gov/show/NCT04480333>. 2020.
31. Nct. Nelfinavir and Favipiravir Combination in Newly Diagnosed COVID19 Egyptian Patients. <https://clinicaltrials.gov/show/NCT04471662>. 2020.
32. Nct. Mild/Moderate 2019-nCoV Remdesivir RCT. <https://clinicaltrials.gov/show/NCT04252664>. 2020.
33. Nct. Sarilumab for Patients With Moderate COVID-19 Disease. <https://clinicaltrials.gov/show/NCT04359901>. 2020.
34. Nct. COLchicine in Moderate-severe Hospitalized Patients Before ARDS to Treat COVID-19. <https://clinicaltrials.gov/show/NCT04363437>. 2020.
35. Nct. The Efficacy of Different Anti-viral Drugs in (Severe Acute Respiratory Syndrome-Corona Virus-2) SARS-CoV-2. <https://clinicaltrials.gov/show/NCT04321616>. 2020.
36. Olender SA, Perez KK, Go AS, Balani B, Price-Haywood EG, Shah NS, et al. Remdesivir for Severe COVID-19 versus a Cohort Receiving Standard of Care. *Clinical infectious diseases*. [Journal: Article in Press]. 2020.
37. Wiersinga WJ, Rhodes A, Cheng AC, Peacock SJ, Prescott HC. Pathophysiology, Transmission, Diagnosis, and Treatment of Coronavirus Disease 2019 (COVID-19): a Review. *JAMA - journal of the american medical association*. [Journal: Article in Press]. 2020.
38. Grein J, Ohmagari N, Shin D, Diaz G, Asperges E, Castagna A, et al. Compassionate Use of Remdesivir for Patients with Severe Covid-19. *The New England journal of medicine*. 2020 Jun 11;382(24):2327-36.
