# Supplementary figures and images for: Efficacy and safety of remdesivir in COVID-19 caused by SARS-CoV-2: a systematic review and meta-analysis
Source: PubMed Central journal article supplement — BMJ Open. 2021 Jun 24;11(6):e048416. doi: 10.1136/bmjopen-2020-048416 (PMC8228818; doi:10.1136/bmjopen-2020-048416), 2021-06-24

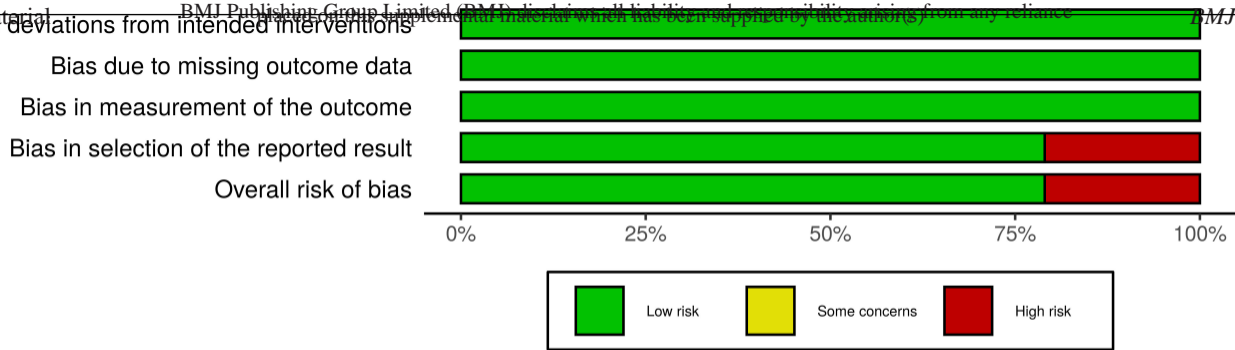

Supplement: bmjopen-2020-048416supp001.pdf [file bmjopen-2020-048416supp001.pdf]
